# Supplementary material for: Bacteria-Driven Fossil Ecosystems as Paleoindicators of Active Continental Margins and the Role of Carbonate Sediment-Hosted Vents in Geodynamic Reconstructions
Source: MDPI journal article supplement (doi:10.3390/min14020125), 2024-01-24

## SUPPORTING MATERIAL

# Bacteria-Driven Fossil Ecosystems as Paleoindicators of Active Continental Margins and the Role of Carbonate Sediment-Hosted Vents in Geodynamic Reconstructions

László Bujtor <sup>1</sup>, Ildikó Gyollai <sup>2,3</sup>, Máté Szabó <sup>2,3</sup>, Ivett Kovács <sup>2,3</sup> and Márta Polgári <sup>1,2,3,\*</sup>

<sup>1</sup> Institute of Geography and Environmental Sciences, Eszterházy Károly Catholic University, 6-8 Leányka Street, H-3300 Eger, Hungary; bujtor.laszlo@uni-eszterhazy.hu

<sup>2</sup> HUN-REN Research Centre for Astronomy and Earth Sciences, Institute for Geological and Geochemical Research, Budaörsi út 45, H-1112 Budapest, Hungary; gyollai.ildiko@csfk.org (I.G.); szabo.mate@csfk.org (M.S.); kovacs.ivett@csfk.org (I.K.)

<sup>3</sup> HUN-REN Research Centre for Astronomy and Earth Sciences, MTA Centre of Excellence, Konkoly Thege Miklós út 15-17, H-1121 Budapest, Hungary

\* Correspondence: rodokrozt@gmail.com

## Content

**SI Figure S1 Samples and thin sections of samples**

**SI Figure S2 Optical rock microscopy photos**

**SI Table S1 Mineralogy and organic compounds by Infra-red spectroscopy (FTIR)**

**SI Figure S3 Representative FTIR measurements on sample 1**

SI Figure S1 Samples and thin sections of samples

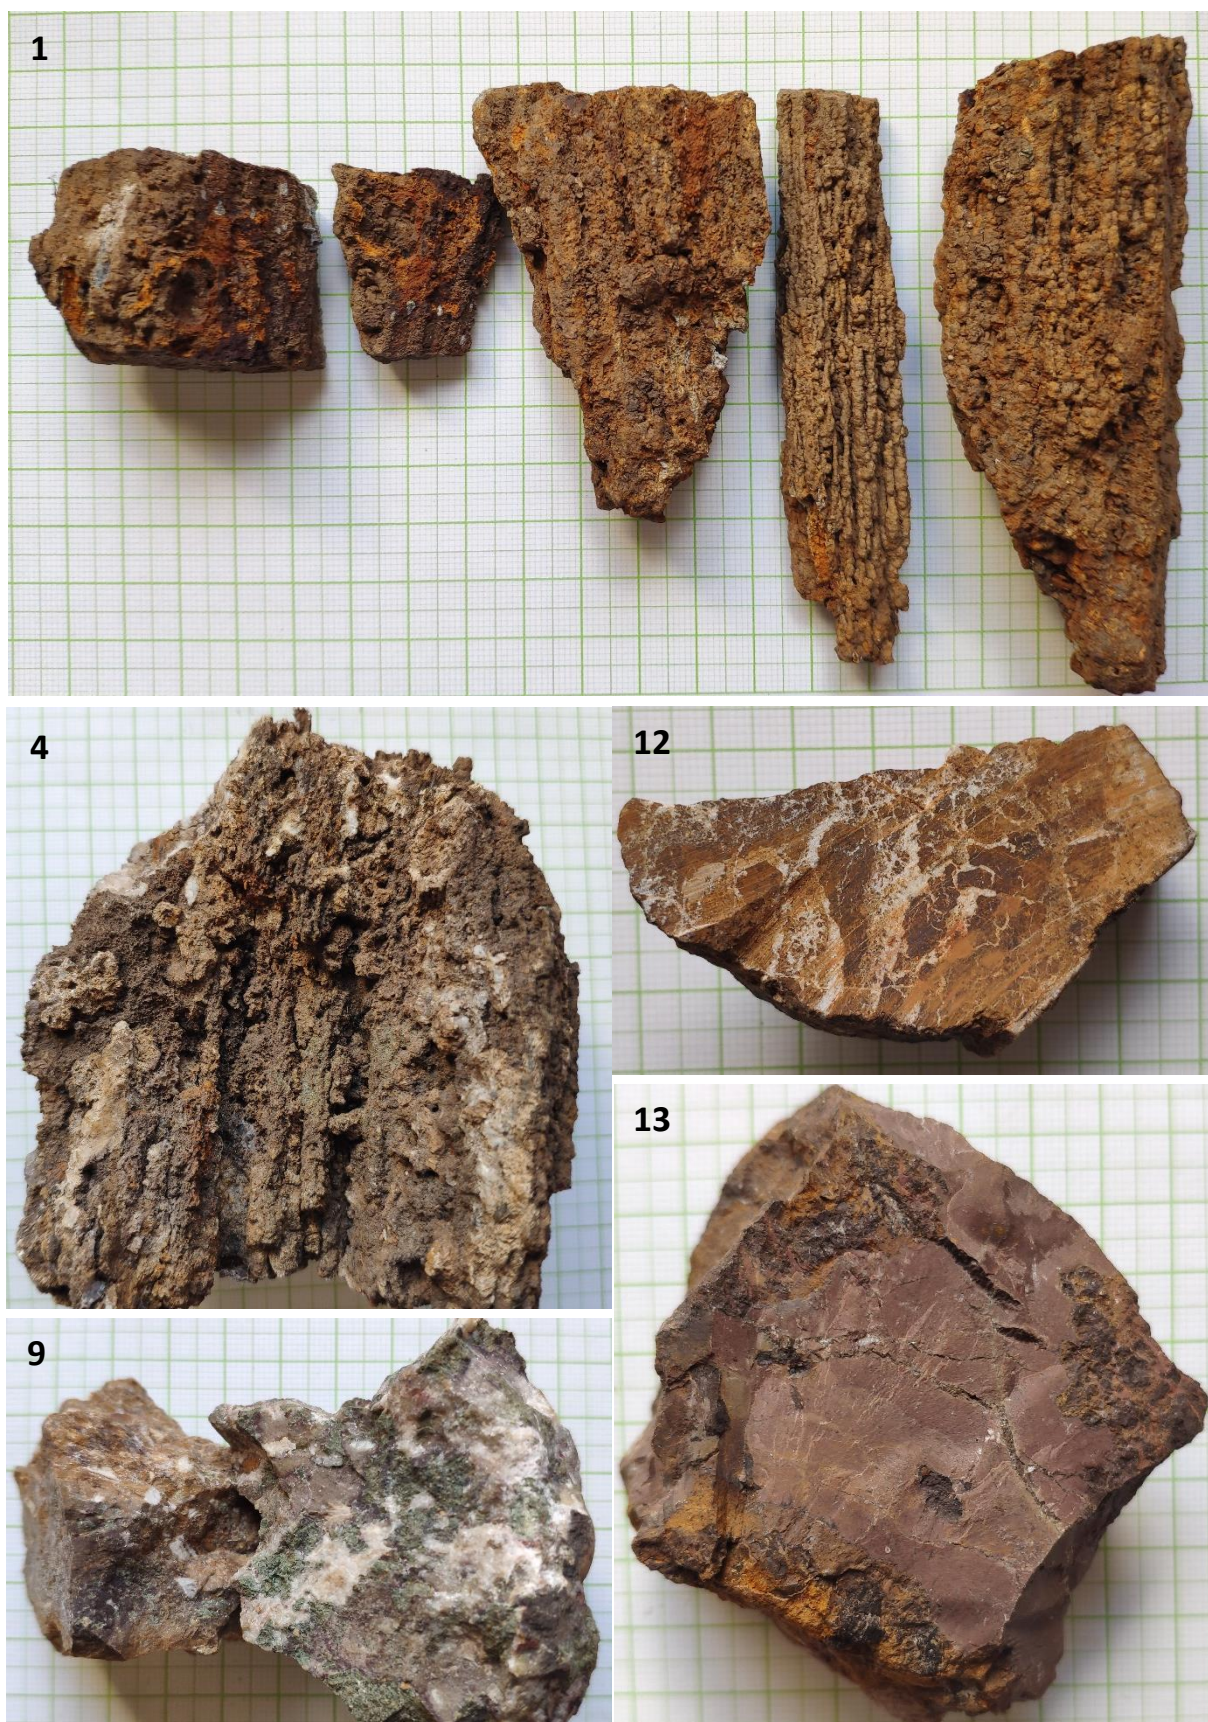

Scale: 1 cm



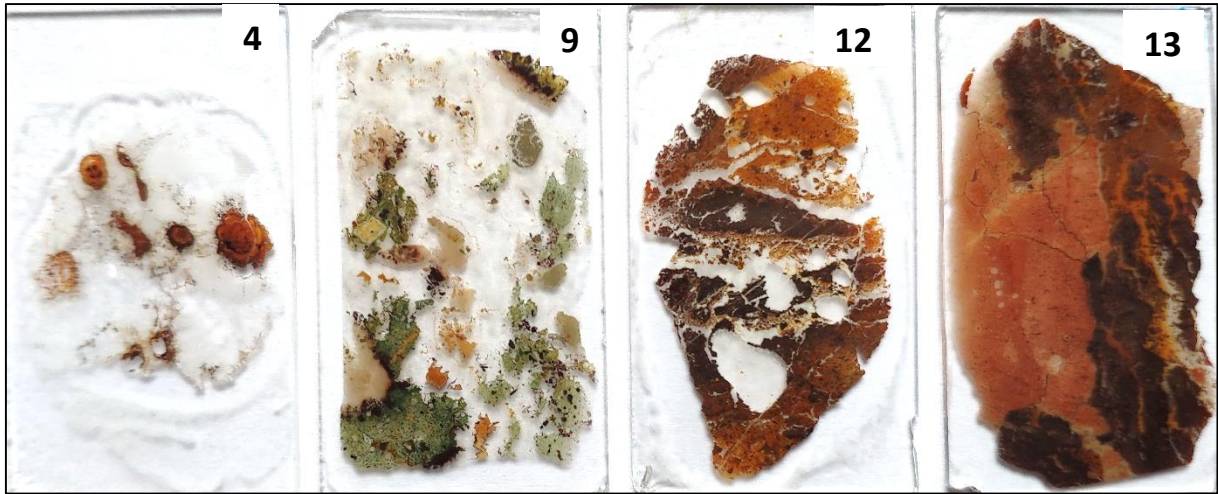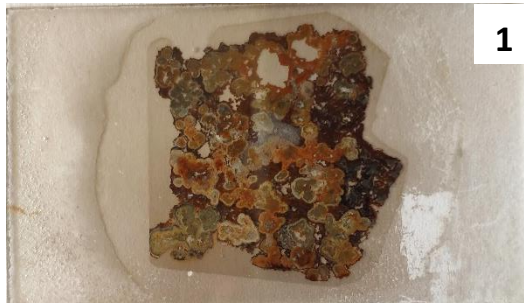

SI Figure S2 Optical rock microscopy photos

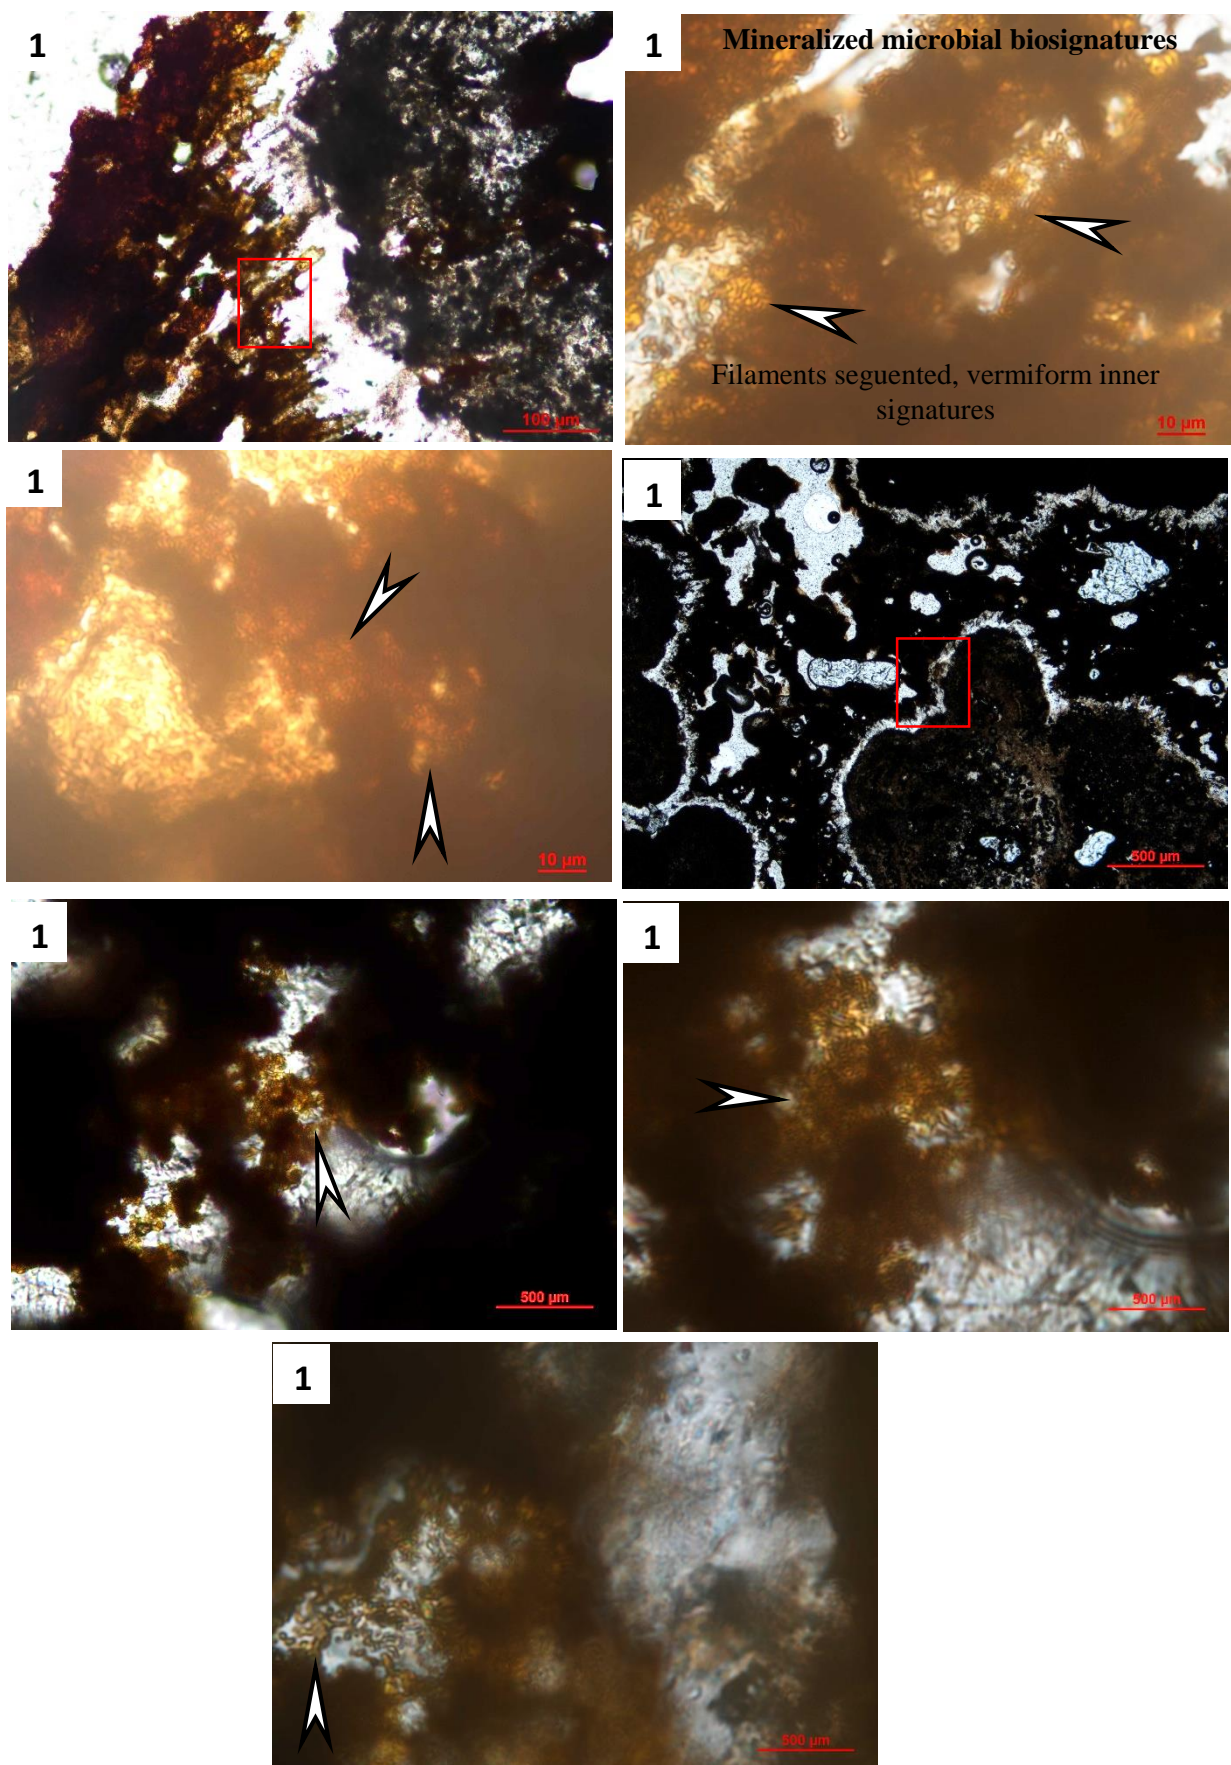



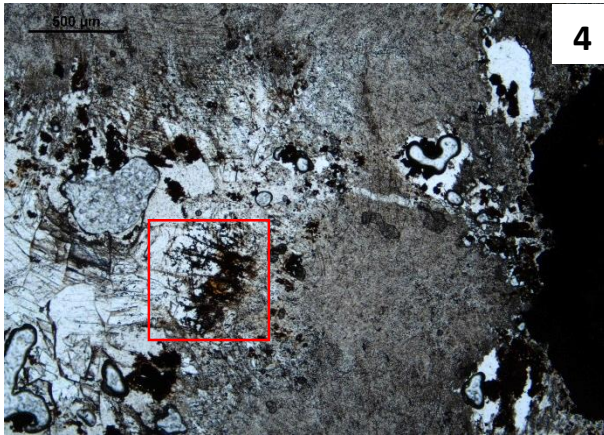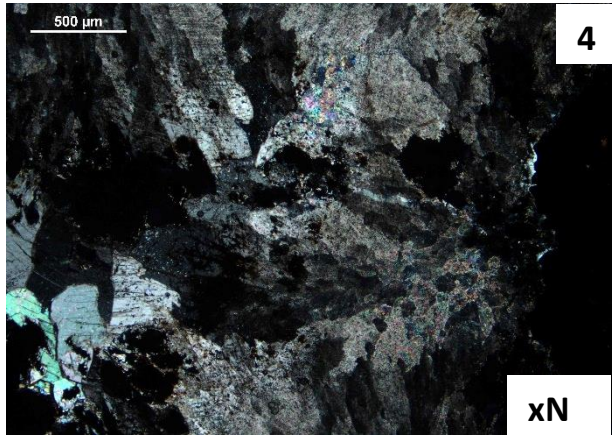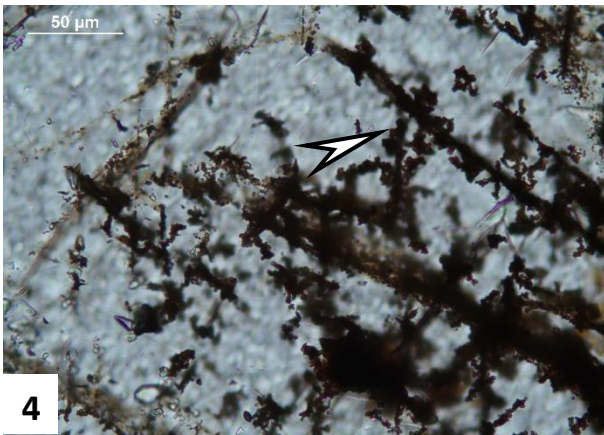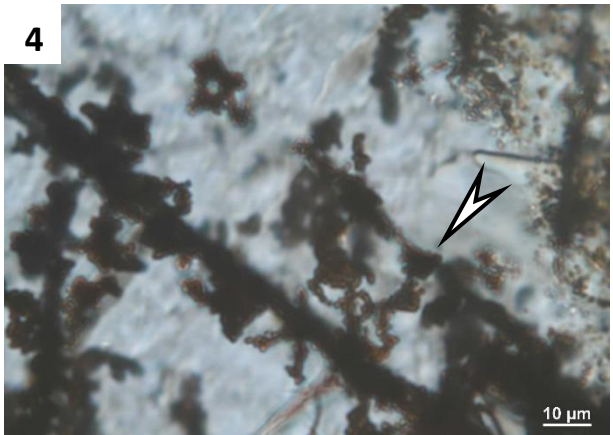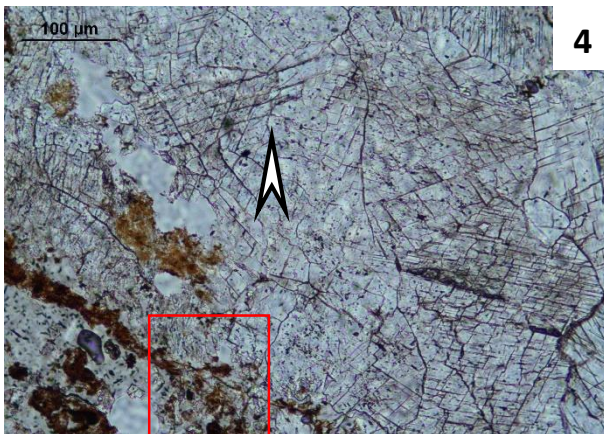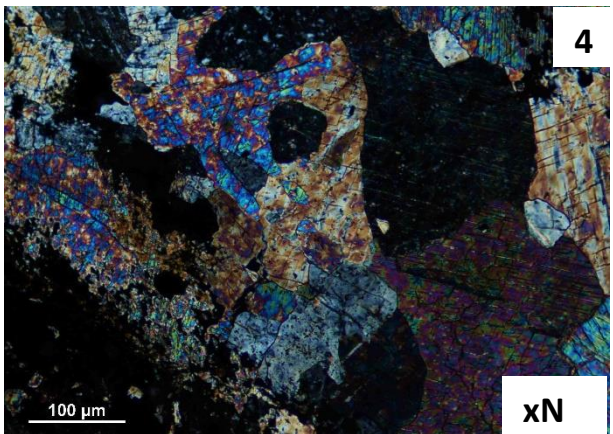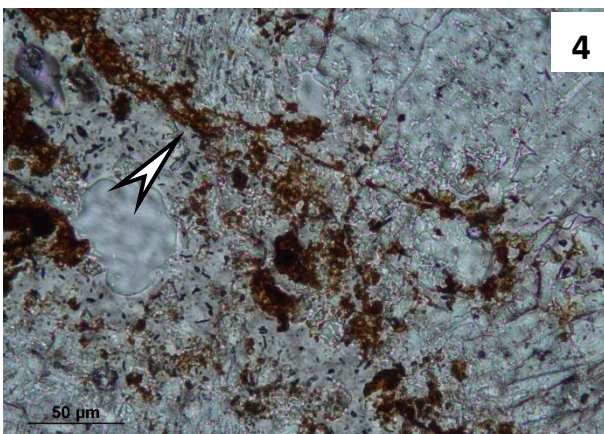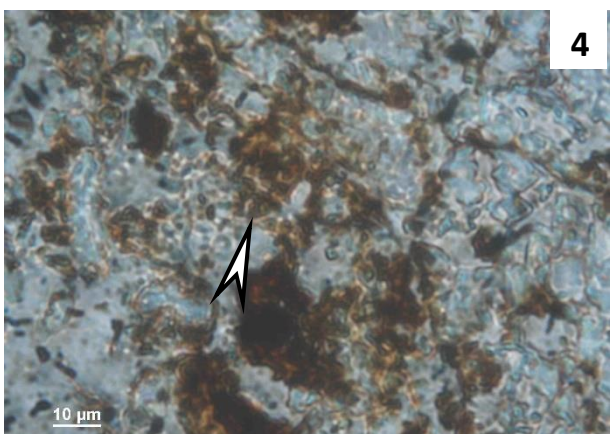



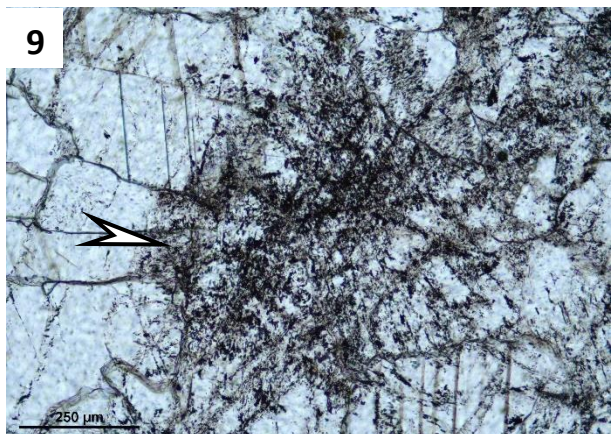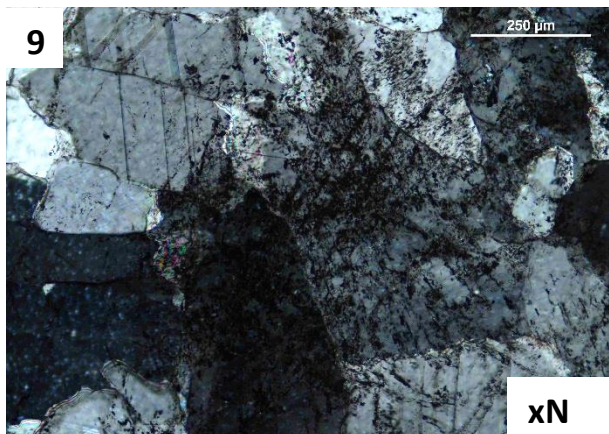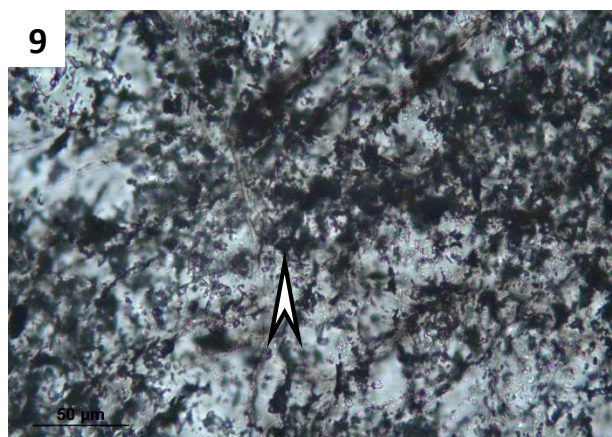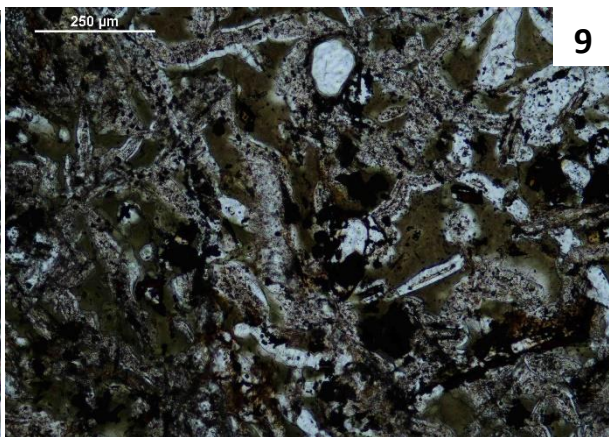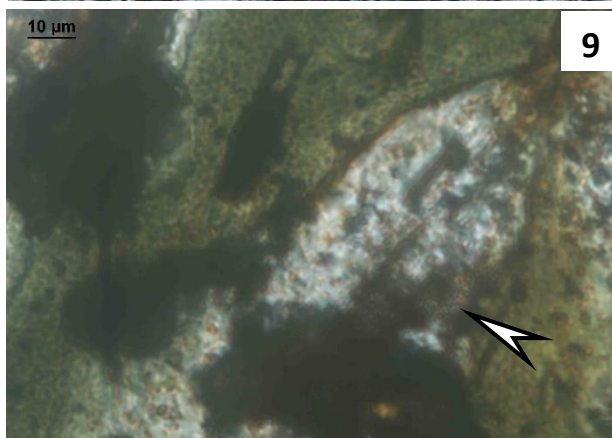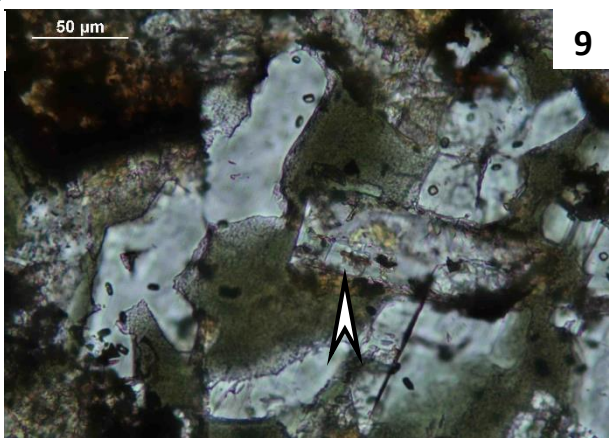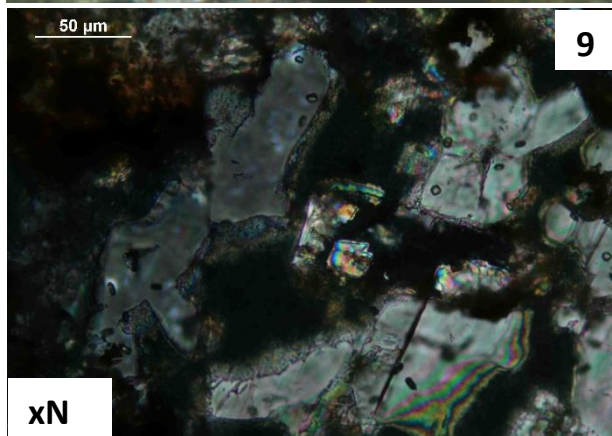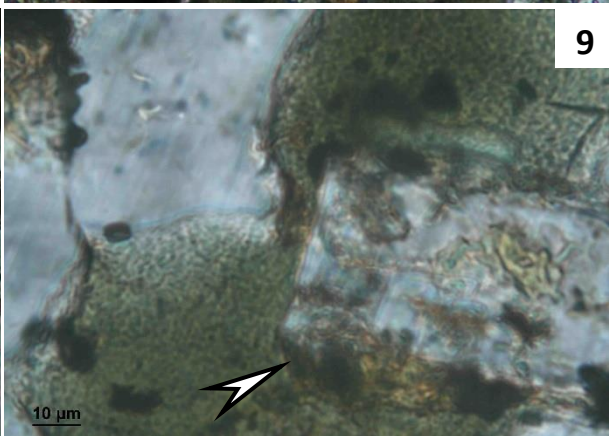



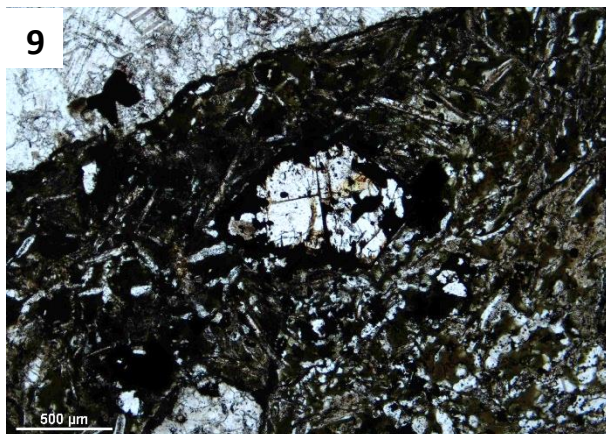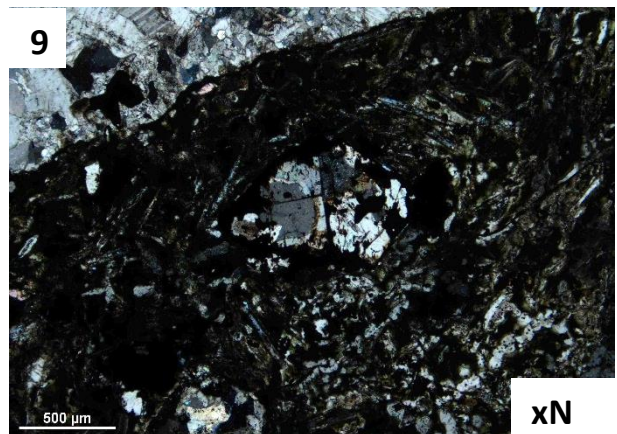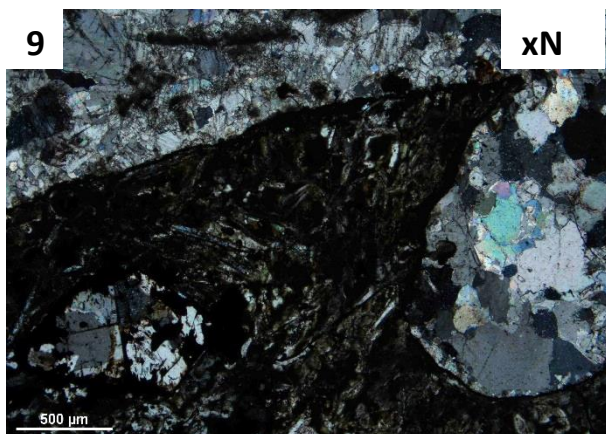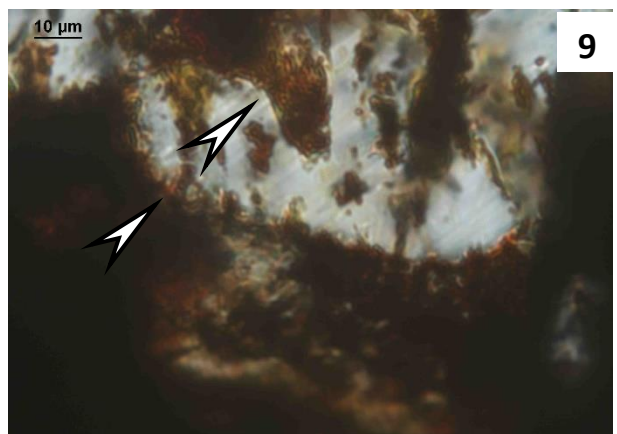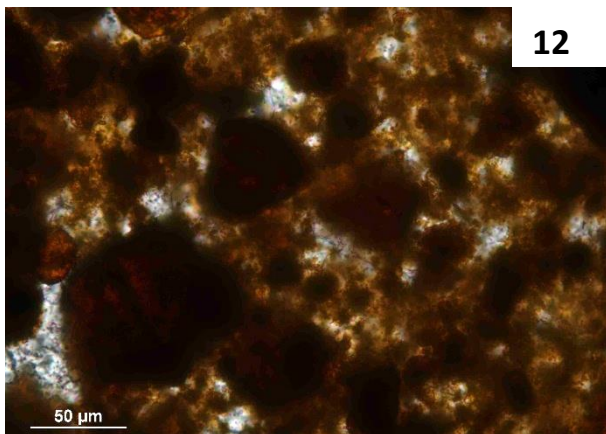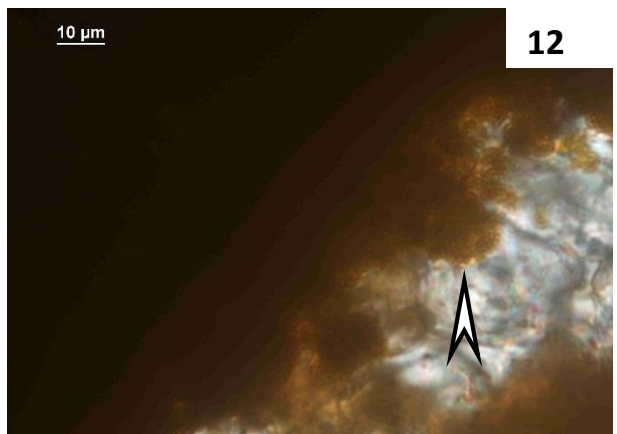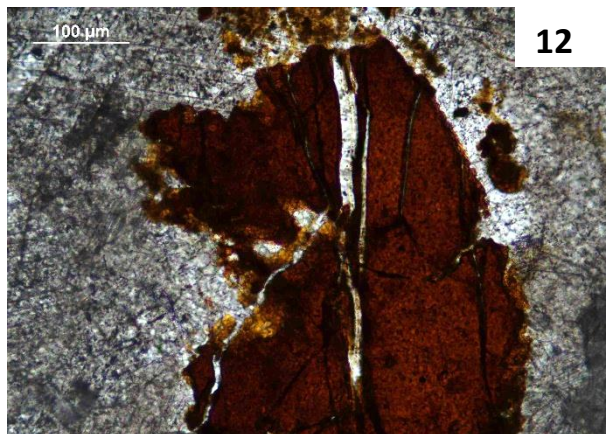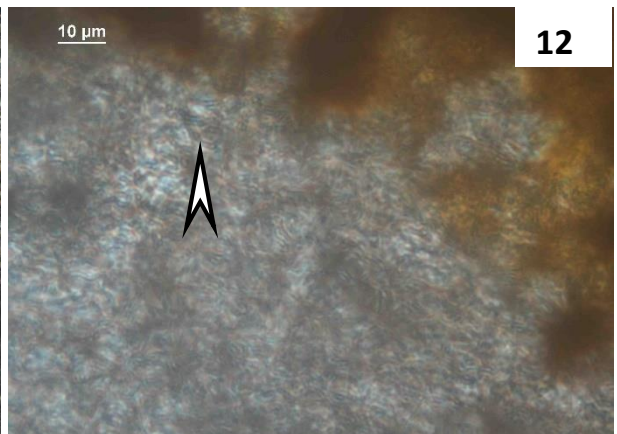



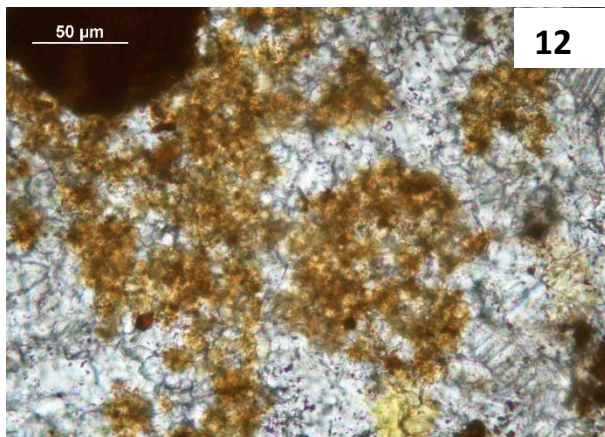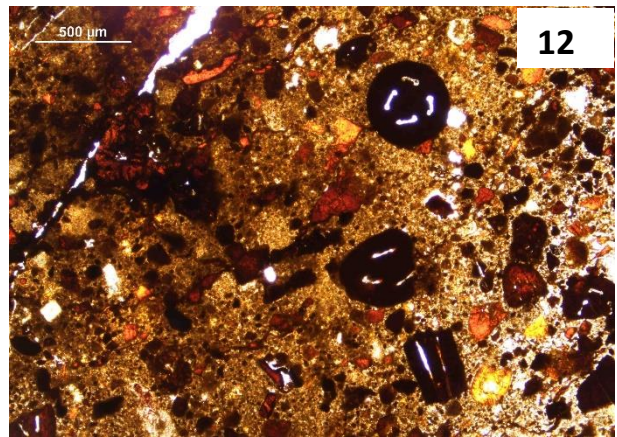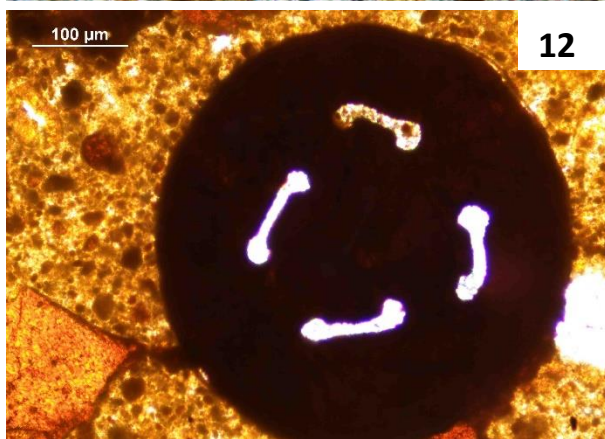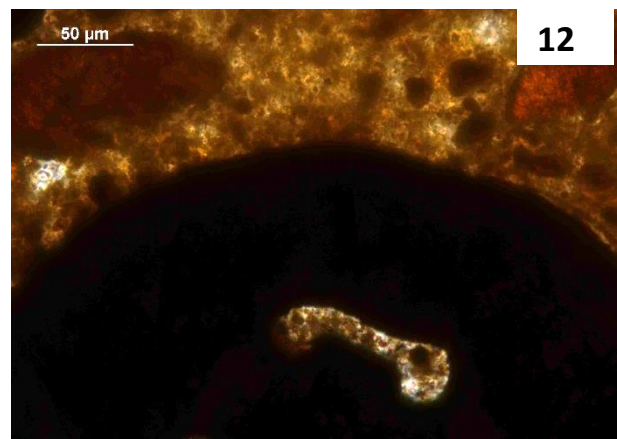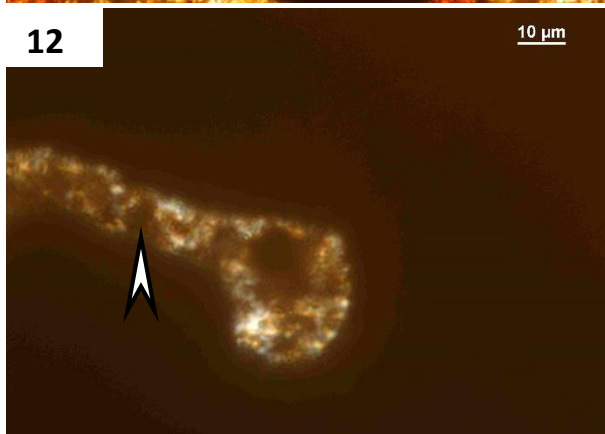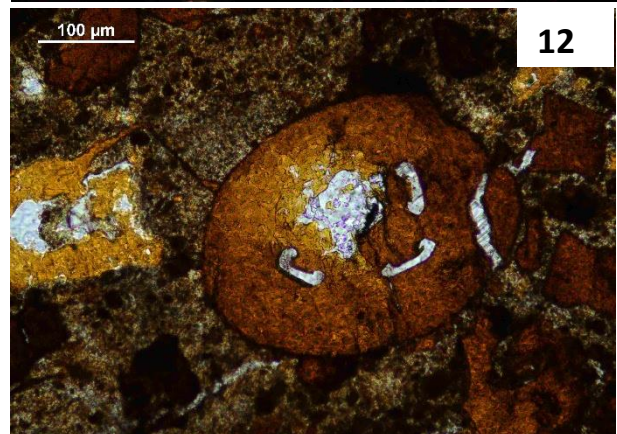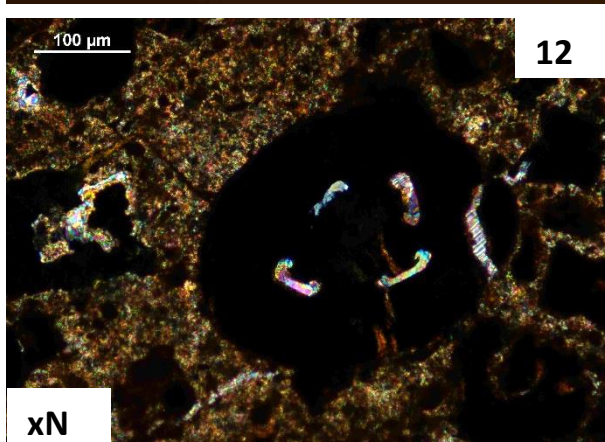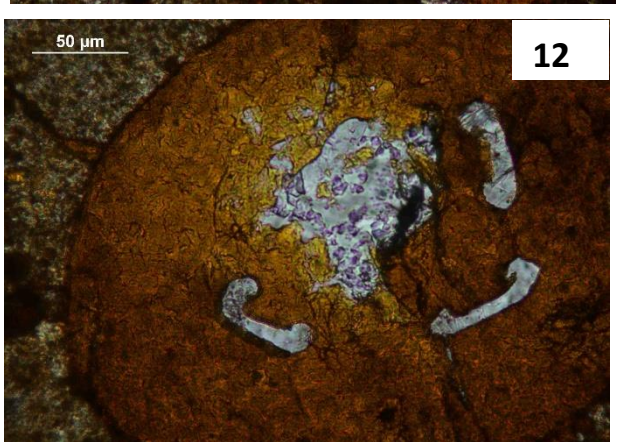



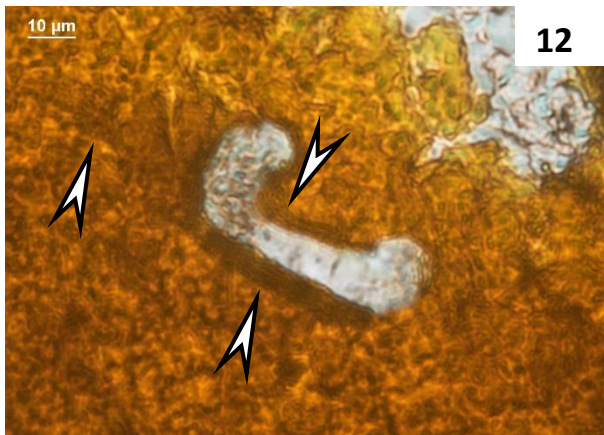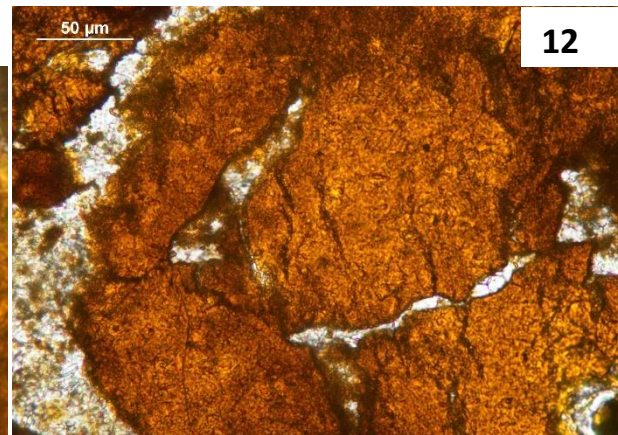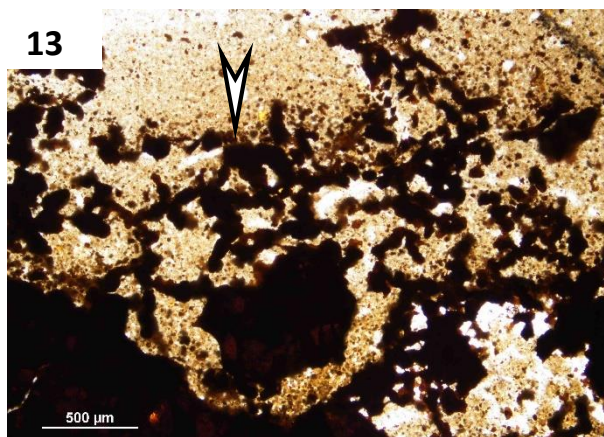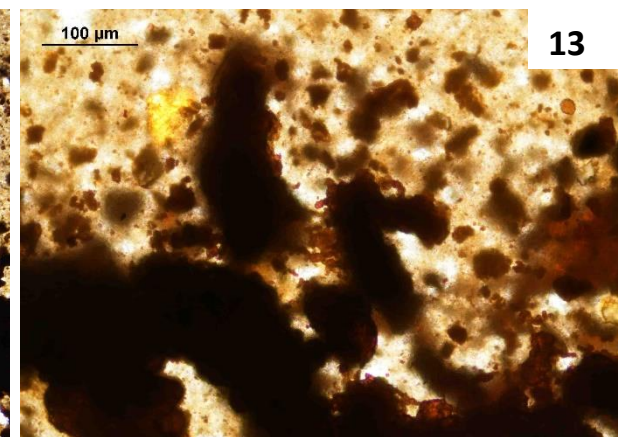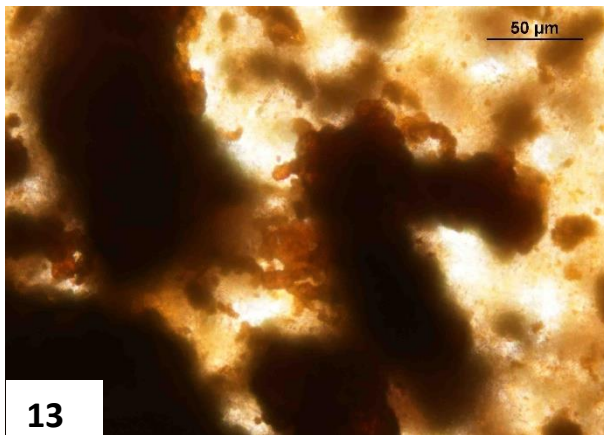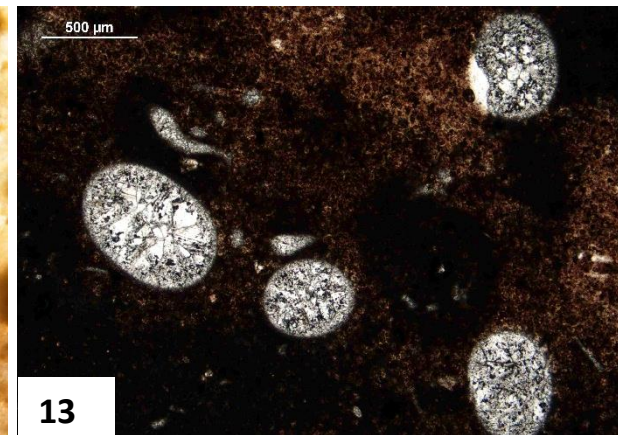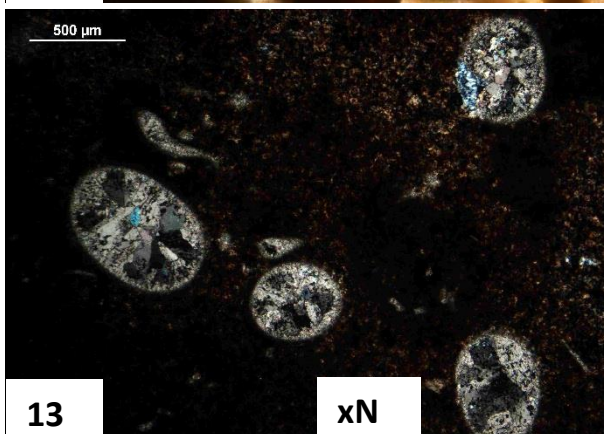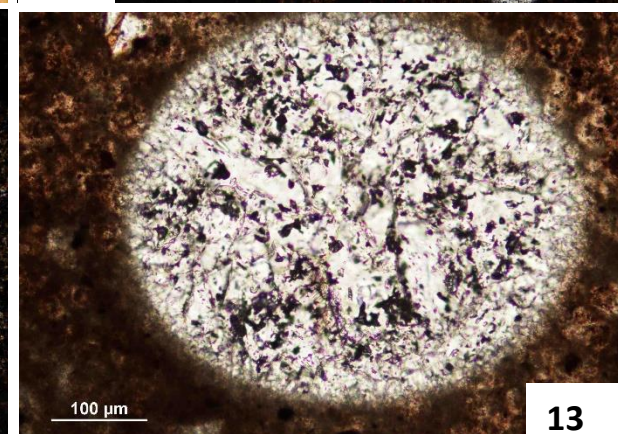



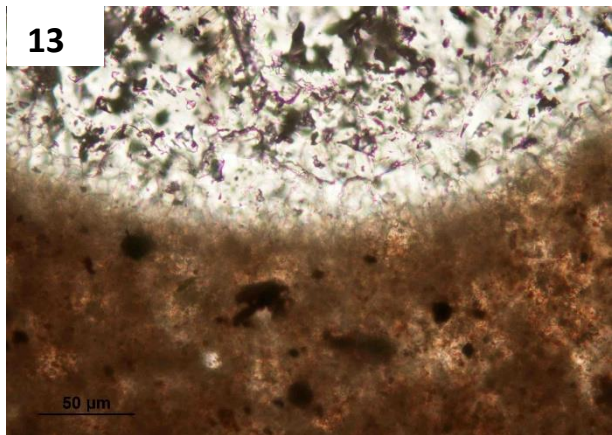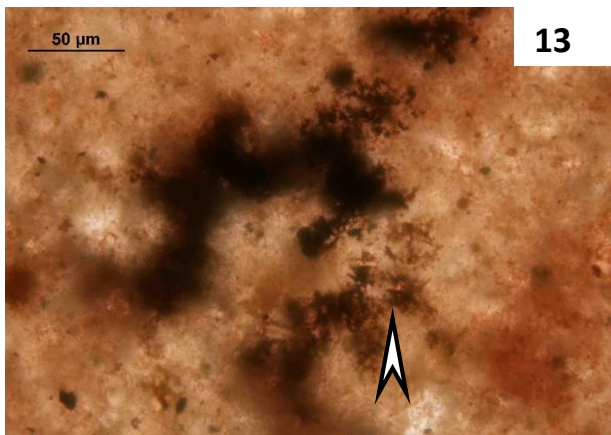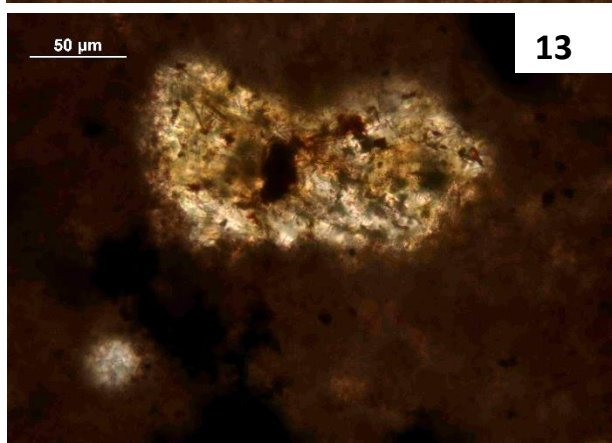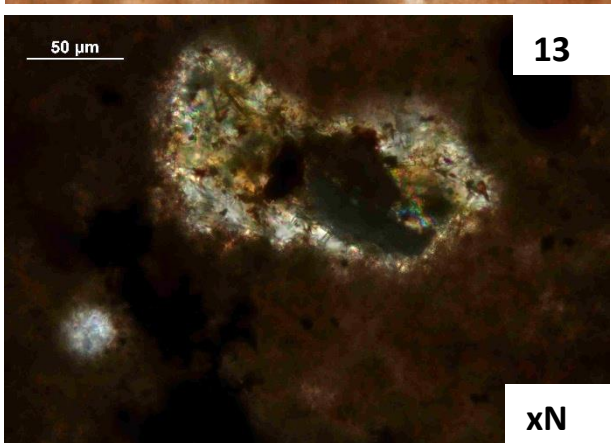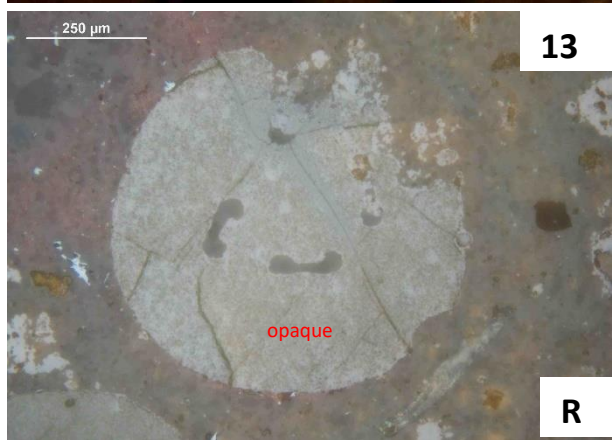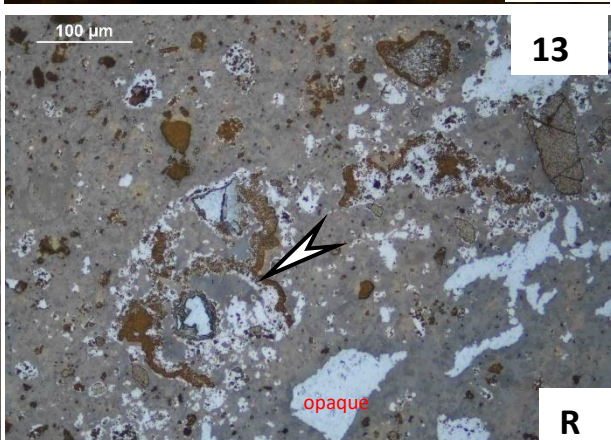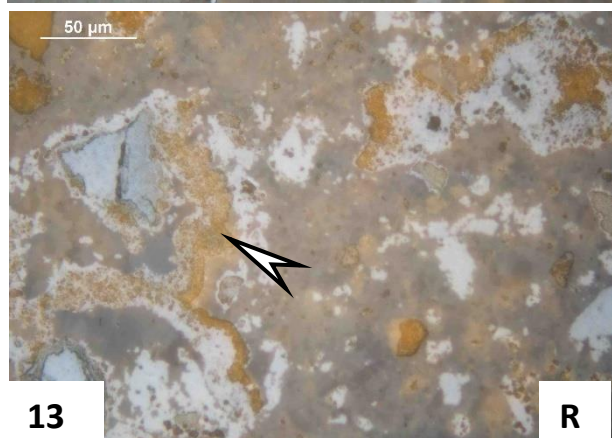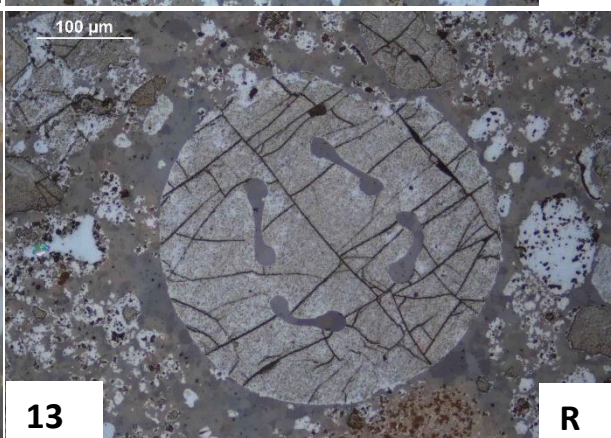



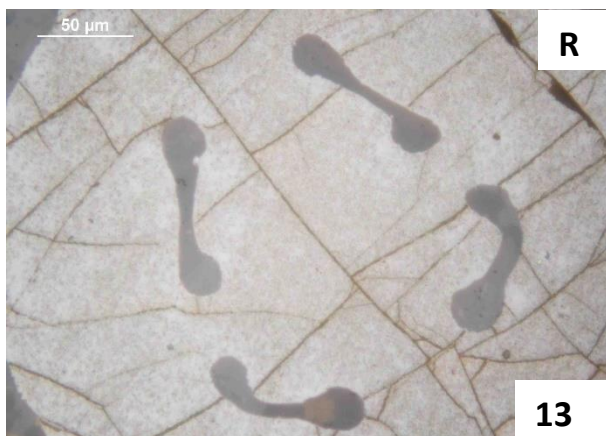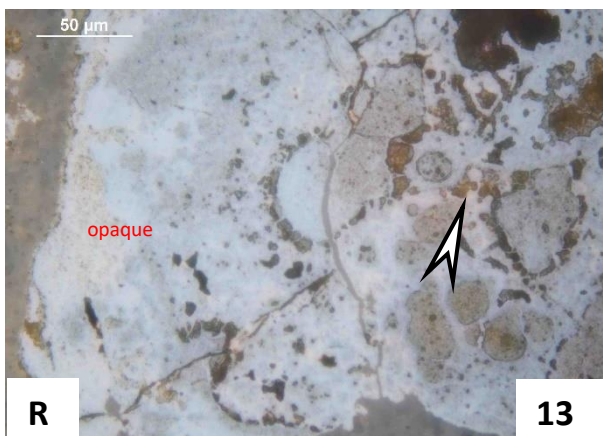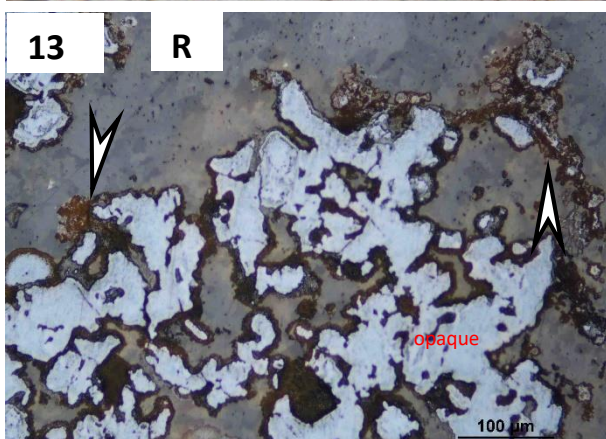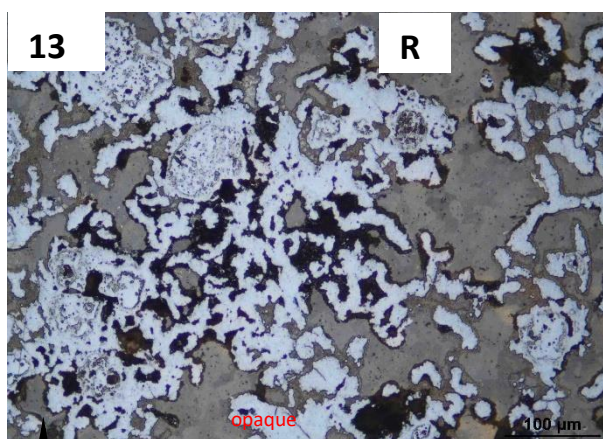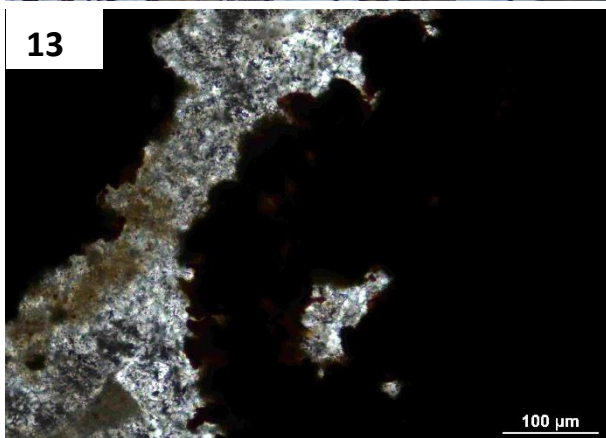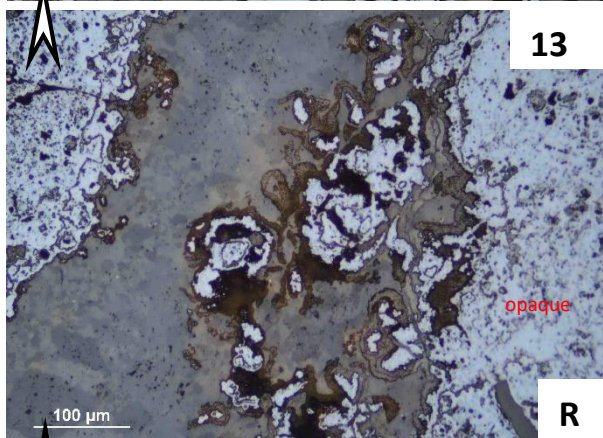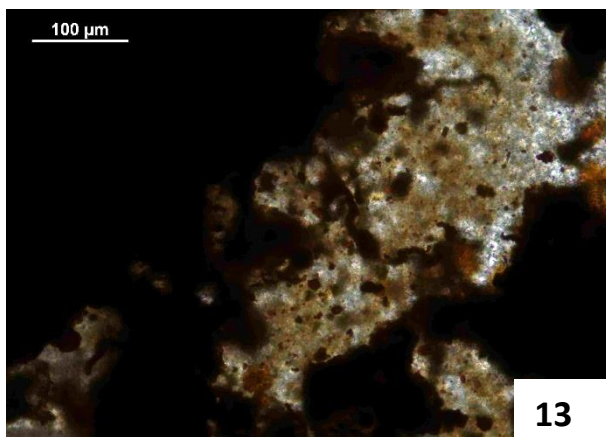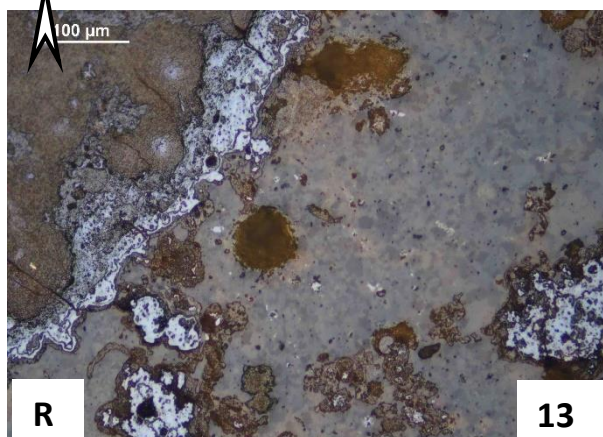



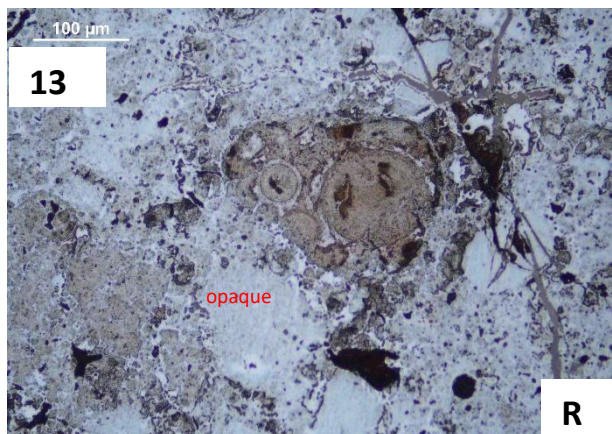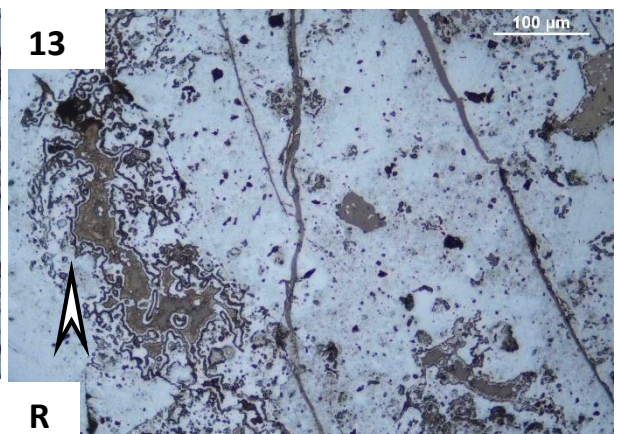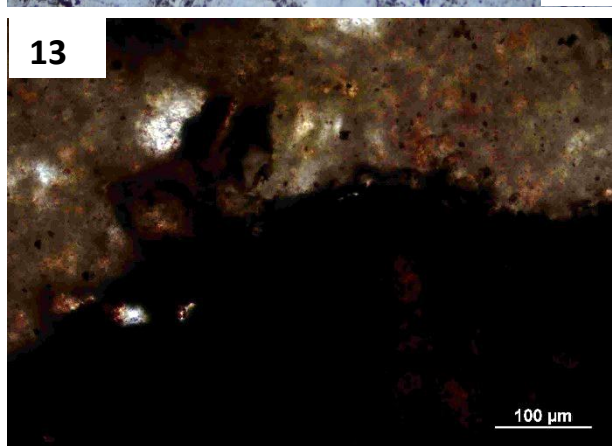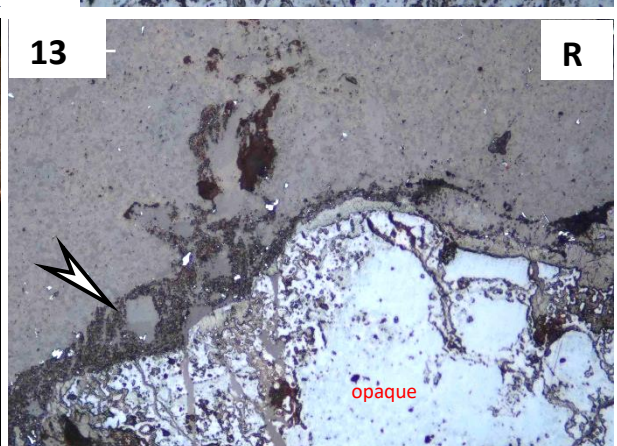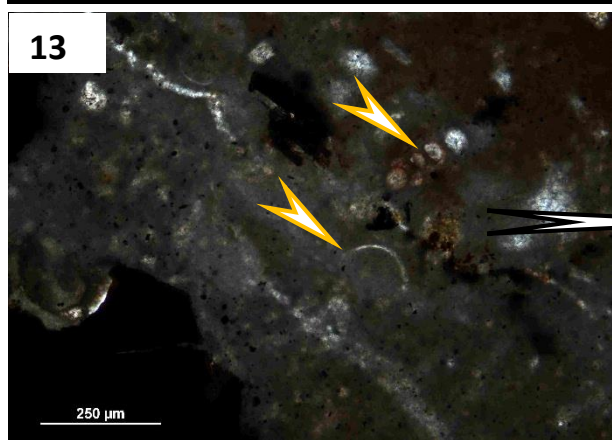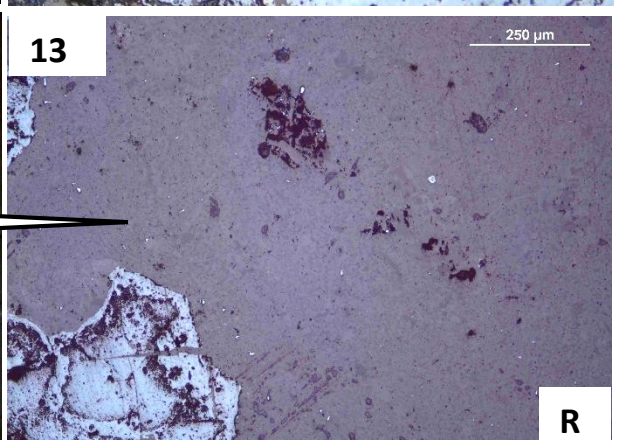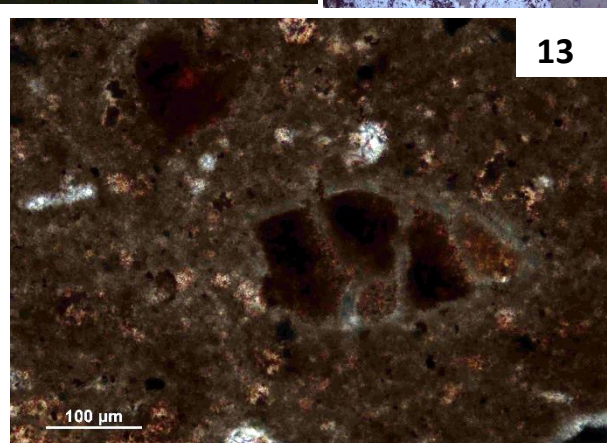



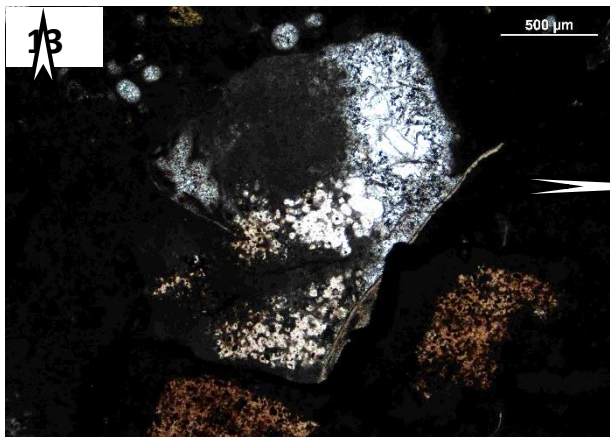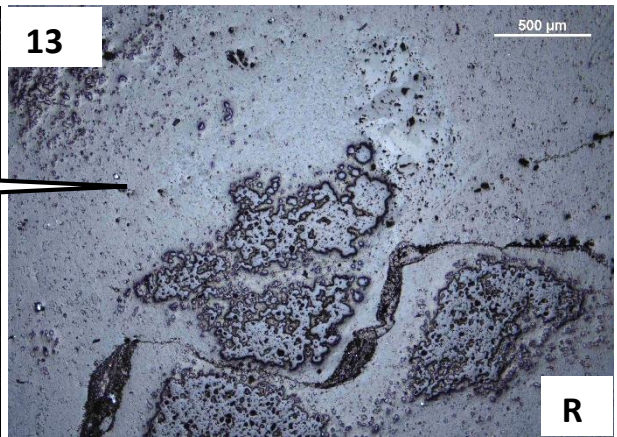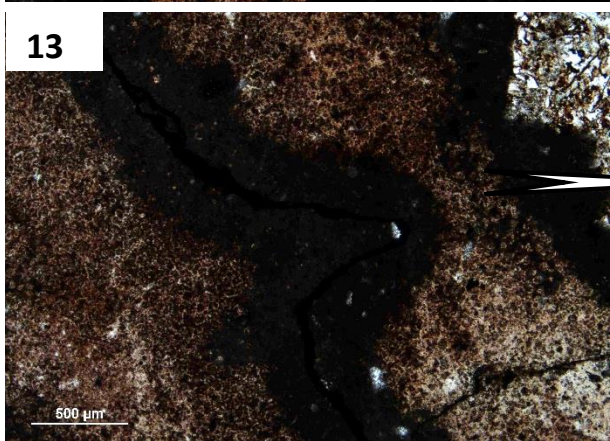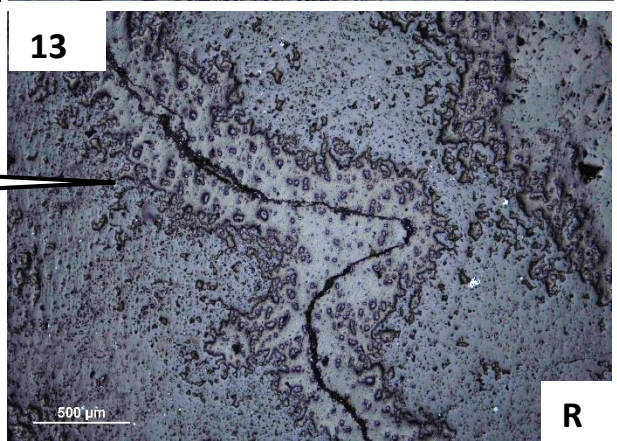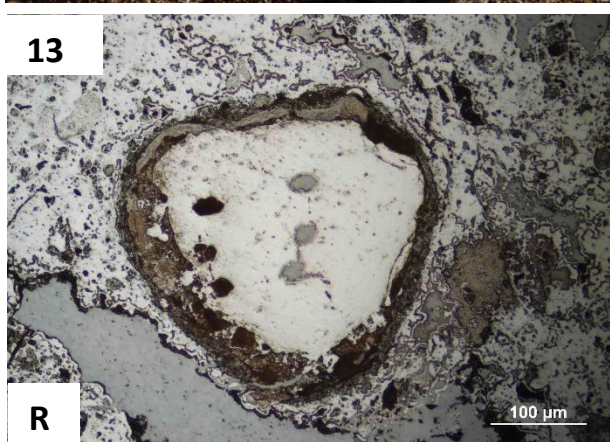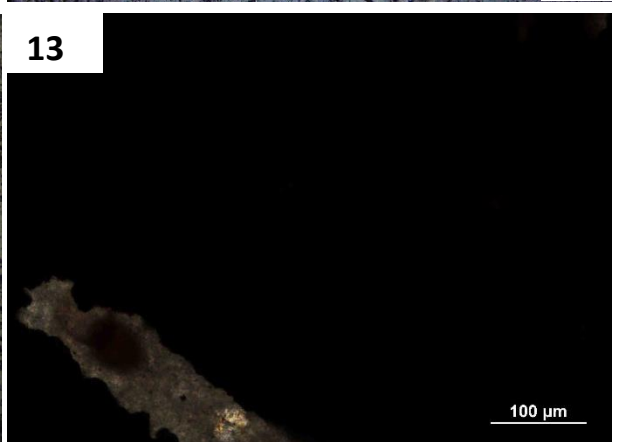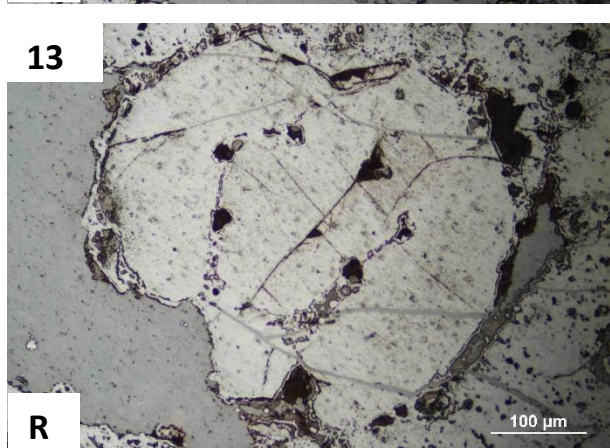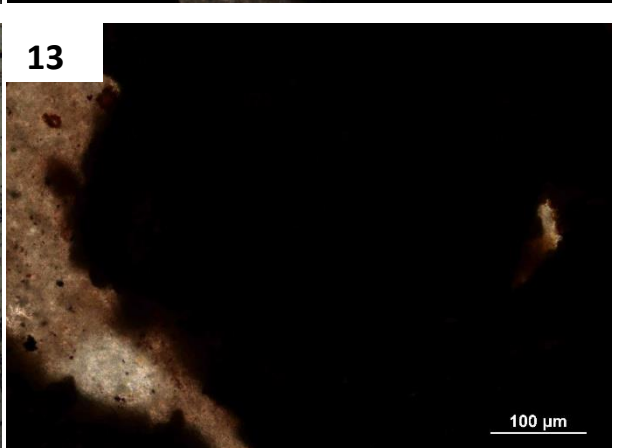



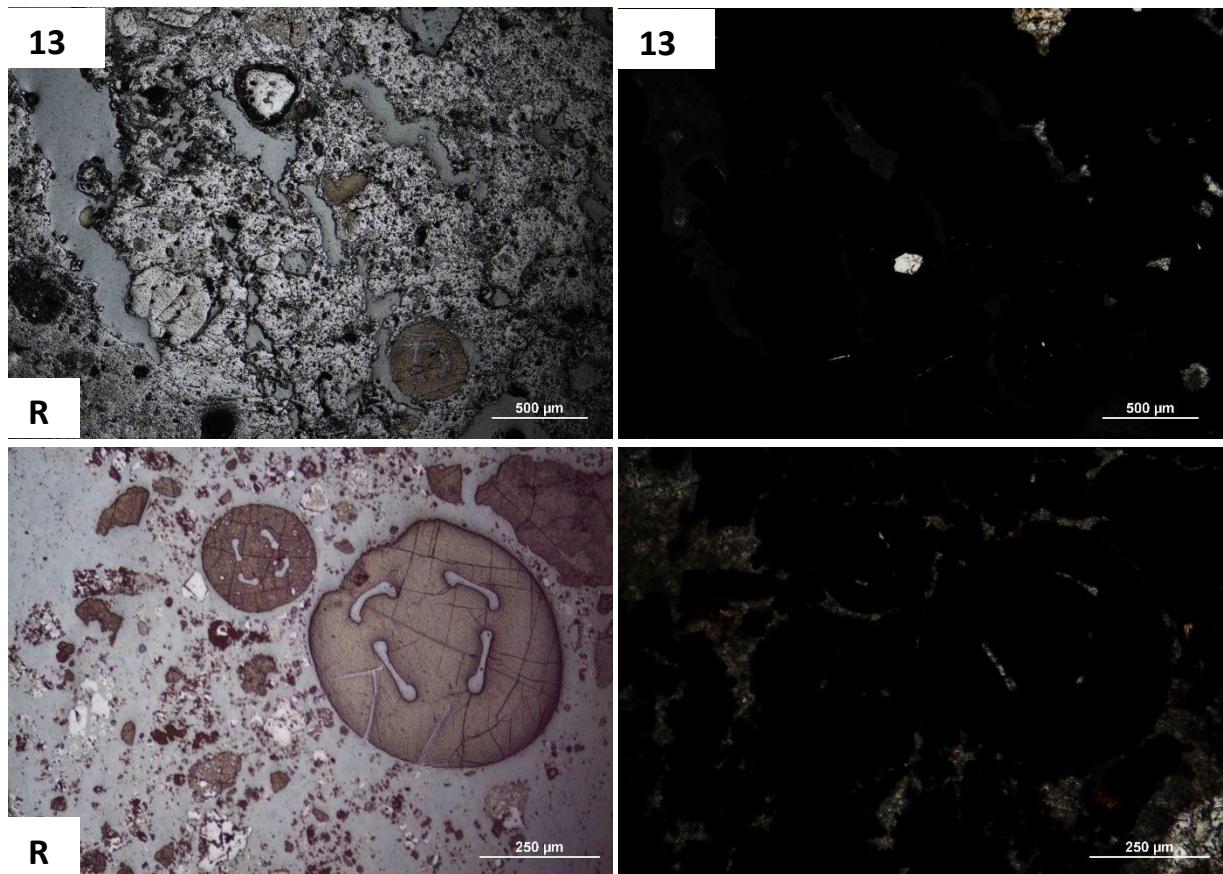

Legend: R-reflective mode; numbers-sample numbers; xN-crossed Nicols  
Other microscopy photos were made under transmitted light mode, 1 N



**SI Table S1 Mineralogy and organic compounds by Infra-red spectroscopy (FTIR)**

| Mecsek                    | References              | Sample ID                              | 1 |   |   |    |    |    |   | 4 |   |    |    |   | 9 |   |   | 12 |    |   | 13 |   |   |   |
|---------------------------|-------------------------|----------------------------------------|---|---|---|----|----|----|---|---|---|----|----|---|---|---|---|----|----|---|----|---|---|---|
| Location of measurement   |                         |                                        | 1 | 2 | 3 | 4  | 5  | 6  | 7 | 1 | 2 | 3a | 3b | 4 | 1 | 2 | 3 | 1  | 2  | 3 | 1  | 2 | 3 | 4 |
| Total No. of spectra→     |                         |                                        | 8 | 6 | 8 | 11 | 11 | 11 | 9 | 4 | 9 | 6  | 6  | 9 | 9 | 9 | 7 | 7  | 13 | 6 | 5  | 6 | 6 | 6 |
| Mineral phase             |                         | Wavelength [cm <sup>-1</sup> ]         |   |   |   |    |    |    |   |   |   |    |    |   |   |   |   |    |    |   |    |   |   |   |
| <i>Carbonates</i>         |                         |                                        |   |   |   |    |    |    |   |   |   |    |    |   |   |   |   |    |    |   |    |   |   |   |
| calcite                   | RRUFF                   |                                        |   |   |   |    |    |    |   | 1 |   |    | 2  | 4 |   | 3 | 2 | 5  | 10 |   | 3  |   |   | 1 |
| dolomite                  | RRUFF                   |                                        |   |   |   |    |    |    |   |   |   |    |    |   | 4 | 1 | 5 |    |    |   |    |   |   |   |
| rhodochrosite             | RRUFF                   | 729, 860, 1394                         |   |   |   |    |    |    |   |   |   |    | 2  |   |   |   |   |    |    | 2 |    |   |   |   |
| kutnohorite               | RRUFF                   | 720, 841, 1424                         |   |   |   |    |    | 9  |   |   |   |    |    |   |   |   |   |    |    |   |    |   |   |   |
| <i>Oxides, hydroxides</i> |                         |                                        |   |   |   |    |    |    |   |   |   |    |    |   |   |   |   |    |    |   |    |   |   |   |
| ferrihydrite              | Glotch & Rossman (2009) | 692, 878, 3400                         |   | 1 |   | 1  | 2  | 2  | 5 | 1 | 3 | 1  |    |   | 2 |   | 4 |    |    |   |    |   | 6 |   |
| magnetite                 | Glotch & Rossman (2009) | 580, 1320                              |   |   |   |    |    | 9  |   |   |   |    |    |   |   |   |   |    |    |   | 6  |   |   |   |
| goethite                  | Glotch & Rossman (2009) | 798, 910, 3400                         | 8 |   |   |    |    | 9  | 5 |   |   |    |    |   |   |   |   | 2  | 12 | 4 | 7  | 6 |   | 5 |
| quartz                    | Müller et al. (2014)    | 701, 776, 1059                         |   |   |   | 6  |    |    |   | 3 | 3 |    |    |   |   |   |   |    |    |   |    |   |   |   |
| <i>Silicates</i>          |                         |                                        |   |   |   |    |    |    |   |   |   |    |    |   |   |   |   |    |    |   |    |   |   |   |
| ferrierite                | RRUFF                   | 562, 701, 1032vs, 1175 sh, 1625, 3249  |   |   |   |    |    |    |   |   |   | 4  | 5  | 6 |   |   |   |    |    |   |    |   |   |   |
| phlogopite                | RRUFF                   | 610, 648, 978, 1004                    |   |   |   |    |    |    |   | 1 |   |    |    |   |   |   |   |    |    |   |    |   |   |   |
| celadonite                | Zviagina et al. (2020)  | 675, 800, 953s, 973s, 1074, 1113, 3641 |   |   |   |    |    |    |   |   |   |    |    |   |   | 1 |   |    |    |   |    |   |   |   |
| albite                    | Müller et al. (2014)    | 798, 984, 1027sh, 1095, 1103           |   | 2 | 2 | 3  |    |    |   |   |   |    |    |   |   | 6 |   |    |    |   |    |   |   |   |
| orthoclase (K-feldspar)   | Müller et al. (2014)    | 717, 1000, 1107sh                      |   | 3 | 3 | 1  |    | 9  | 2 |   |   |    |    |   | 3 |   |   |    |    |   |    |   |   |   |



|                                   |                           |                               |   |   |   |    |    |    |   |   |   |   |   |   |   |   |   |   |    |   |   |   |   |
|-----------------------------------|---------------------------|-------------------------------|---|---|---|----|----|----|---|---|---|---|---|---|---|---|---|---|----|---|---|---|---|
| <b>Phosphates</b>                 |                           |                               |   |   |   |    |    |    |   |   |   |   |   |   |   |   |   |   |    |   |   |   |   |
| <b>apatite</b>                    | Beasley et al. (2014)     | 790, 1012, 1093               | 8 |   | 3 |    | 9  |    | 2 |   |   |   |   |   |   | 2 |   |   | 2  | 5 |   |   |   |
| <b>Sulphates</b>                  |                           |                               |   |   |   |    |    |    |   |   |   |   |   |   |   |   |   |   |    |   |   |   |   |
| <b>gypsum</b>                     | RRUFF                     | 610, 681, 1107 vs, 3400, 3526 |   |   |   |    |    |    |   |   | 3 |   |   |   | 2 |   |   |   |    |   |   |   |   |
| <b>Organic compounds</b>          |                           |                               |   |   |   |    |    |    |   |   |   |   |   |   |   |   |   |   |    |   |   |   |   |
| v C=C/C-O                         | Parikh & Chorover (2006)  | 1070-1240                     | 3 |   |   |    |    |    |   |   |   |   | 4 |   |   |   | 2 |   |    |   |   |   |   |
| vs CO                             | Parikh & Chorover (2006)  | 1360-1450                     |   |   |   |    |    |    |   |   |   |   | 4 | 4 |   |   | 2 |   |    |   |   |   |   |
| d CH <sub>2</sub>                 | Parikh & Chorover (2006)  | 1454-1482                     | 8 |   |   |    | 11 |    |   |   |   |   | 4 | 4 |   |   |   |   | 6  |   | 2 |   |   |
| C-N, CH deformation               | Parikh & Chorover (2006)  | 1526                          |   | 4 |   |    | 11 |    |   |   |   |   | 4 | 6 |   |   |   |   |    |   |   |   |   |
| C-N N-H amide II                  | Parikh & Chorover (2006)  | 1540-1550                     |   |   |   |    |    | 9  | 1 | 9 |   | 4 |   |   |   |   | 2 |   |    |   |   |   |   |
| v as COOH                         | Parikh & Chorover (2006)  | 1720-29                       |   |   |   |    | 11 | 11 | 9 |   | 9 |   | 4 |   |   |   | 7 |   |    |   |   |   |   |
| C-O                               | Parikh & Chorover (2006)  | 1799                          |   |   |   |    |    |    |   |   |   |   |   | 6 |   |   |   |   |    |   |   |   |   |
| CO                                | Parikh & Chorover (2006)  | 2343                          | 8 |   | 8 | 11 |    |    |   | 4 | 9 |   | 6 | 6 | 9 | 9 | 7 | 7 | 13 |   |   | 6 |   |
| CO                                | Parikh & Chorover (2006)  | 2365                          | 8 |   | 8 | 11 |    |    |   | 4 | 9 |   | 6 | 6 | 9 | 9 | 7 | 7 | 13 |   |   | 6 |   |
| C-H sym. stretch CH <sub>2</sub>  | Parikh & Chorover (2006)  | 2853                          |   |   |   |    | 11 | 11 | 9 |   |   |   | 6 |   |   |   | 7 |   |    |   |   |   |   |
| C-H asym. stretch CH <sub>2</sub> | Parikh & Chorover (2006)  | 2926                          |   |   |   |    | 11 | 11 | 9 |   |   |   | 6 |   |   |   | 7 |   |    |   |   |   |   |
| OH                                | Madejová & Komádel (2001) | 3230-3700                     |   |   |   |    |    |    | 4 | 9 |   |   | 6 |   |   |   |   |   | 12 | 4 |   | 6 | 3 |



## References:

- Beasley, M. M., Bartelink, E. J., Taylor, L., & Miller, R. M. (2014). Comparison of transmission FTIR, ATR, and DRIFT spectra: implications for assessment of bone bioapatite diagenesis. *Journal of Archaeological Science*, 46, 16-22.
- Glotch, T. D., & Rossman, G. R. (2009). Mid-infrared reflectance spectra and optical constants of six iron oxide/oxyhydroxide phases. *Icarus*, 204(2), 663-671.
- Madejova, J., & Komadel, P. (2001). Baseline studies of the clay minerals society source clays: infrared methods. *Clays and clay minerals*, 49(5), 410-432.
- Müller, C. M., Pejčic, B., Esteban, L., Delle Piane, C., Raven, M., & Mizaikoff, B. (2014). Infrared attenuated total reflectance spectroscopy: an innovative strategy for analyzing mineral components in energy relevant systems. *Scientific Reports*, 4, 6764.
- Parikh, S. J., & Chorover, J. (2006). ATR-FTIR spectroscopy reveals bond formation during bacterial adhesion to iron oxide. *Langmuir*, 22(20), 8492-8500.

## RRUFF Database

- Zviagina, B. B., Drits, V. A., & Dorzhieva, O. V. (2020). Distinguishing Features and Identification Criteria for K-Dioctahedral 1M Micas (Illite-Aluminoceladonite and Illite-Glaucanite-Celadonite Series) from Middle-Infrared Spectroscopy Data. *Minerals*, 10(2), 153.



SI Figure S3 Representative FTIR measurements on sample 1

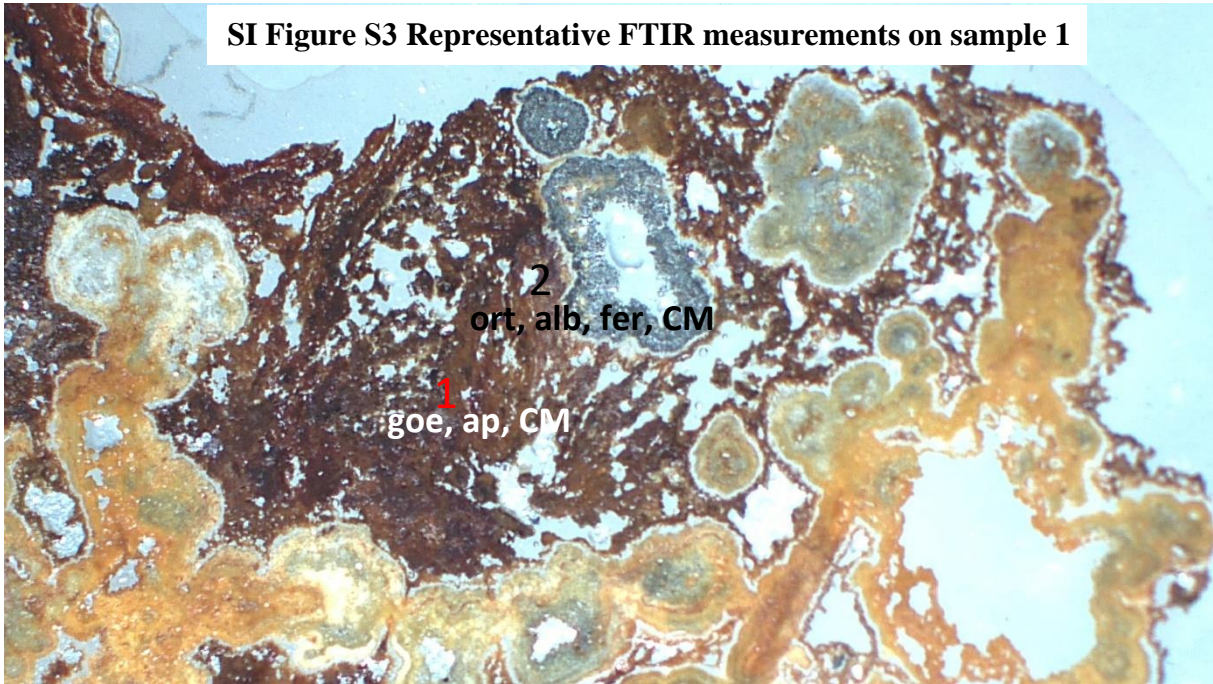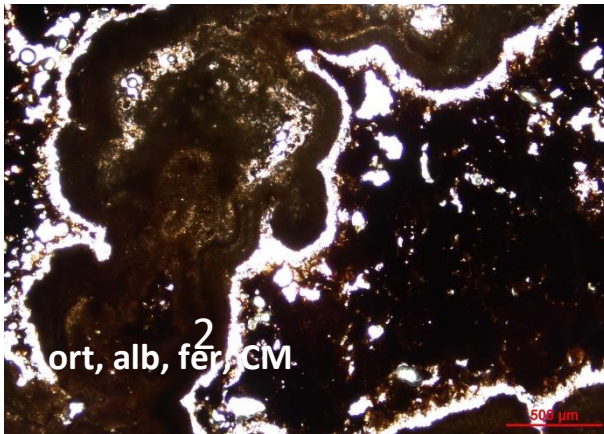

**Sample 1 – typical mineralized microbial system**  
Cross cut of hydrothermal, mineralized discharge system

Legend + CM-carbonaceous material

goe-goethite  
mag-magnetite  
fer-ferrihydrite  
ap-apatite  
q-quartz  
ort-orthoclase  
alb-albite  
kutn-kutnohorite

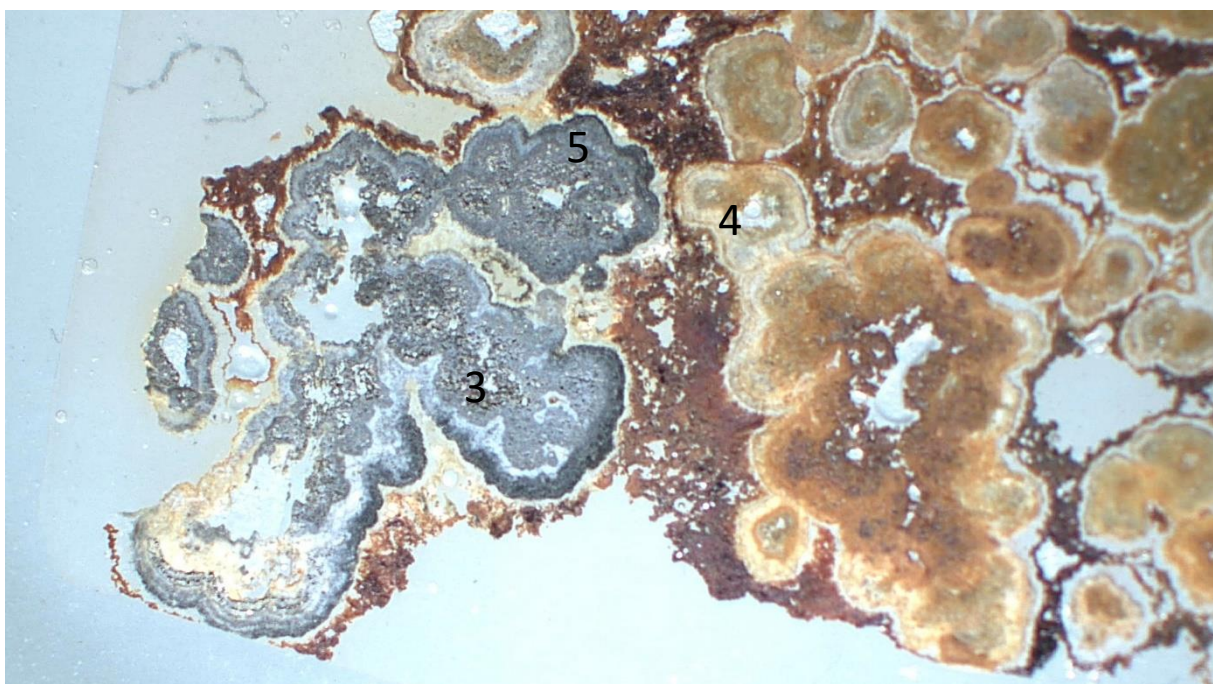



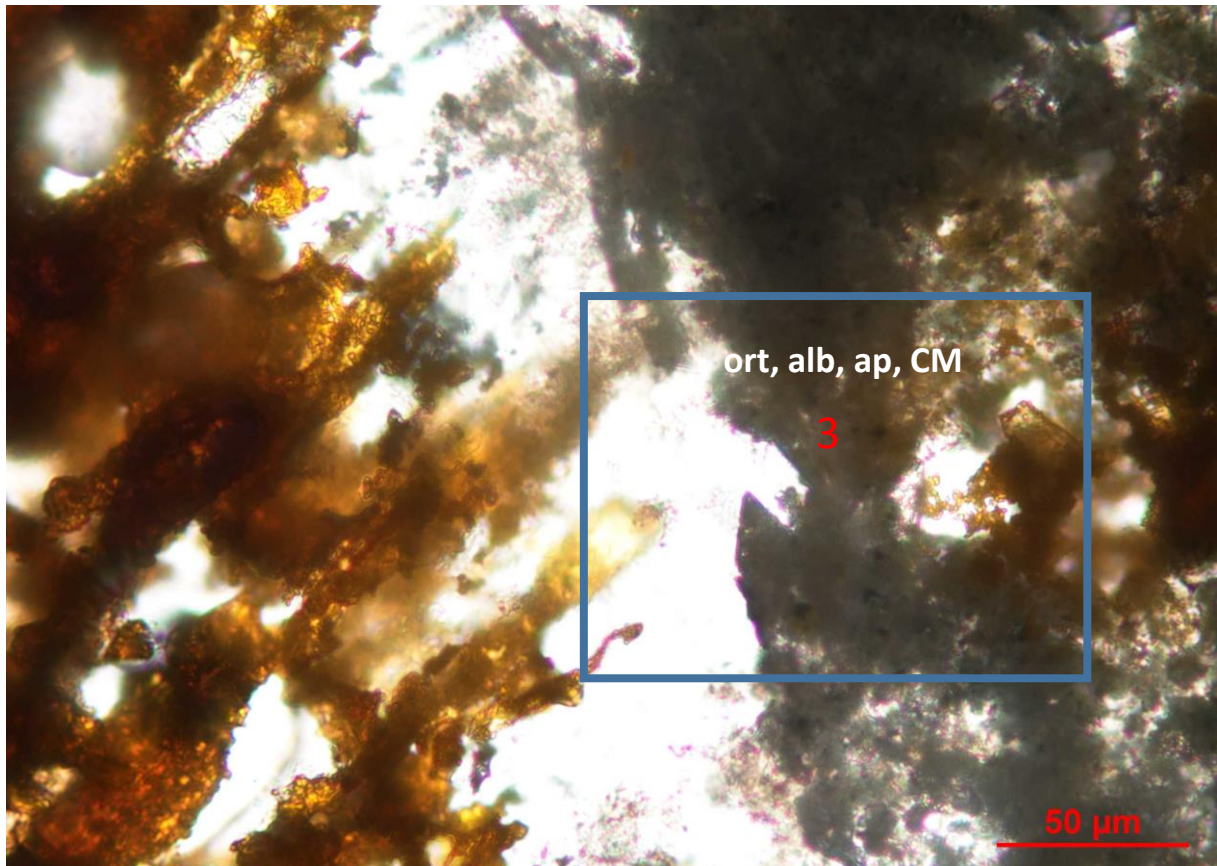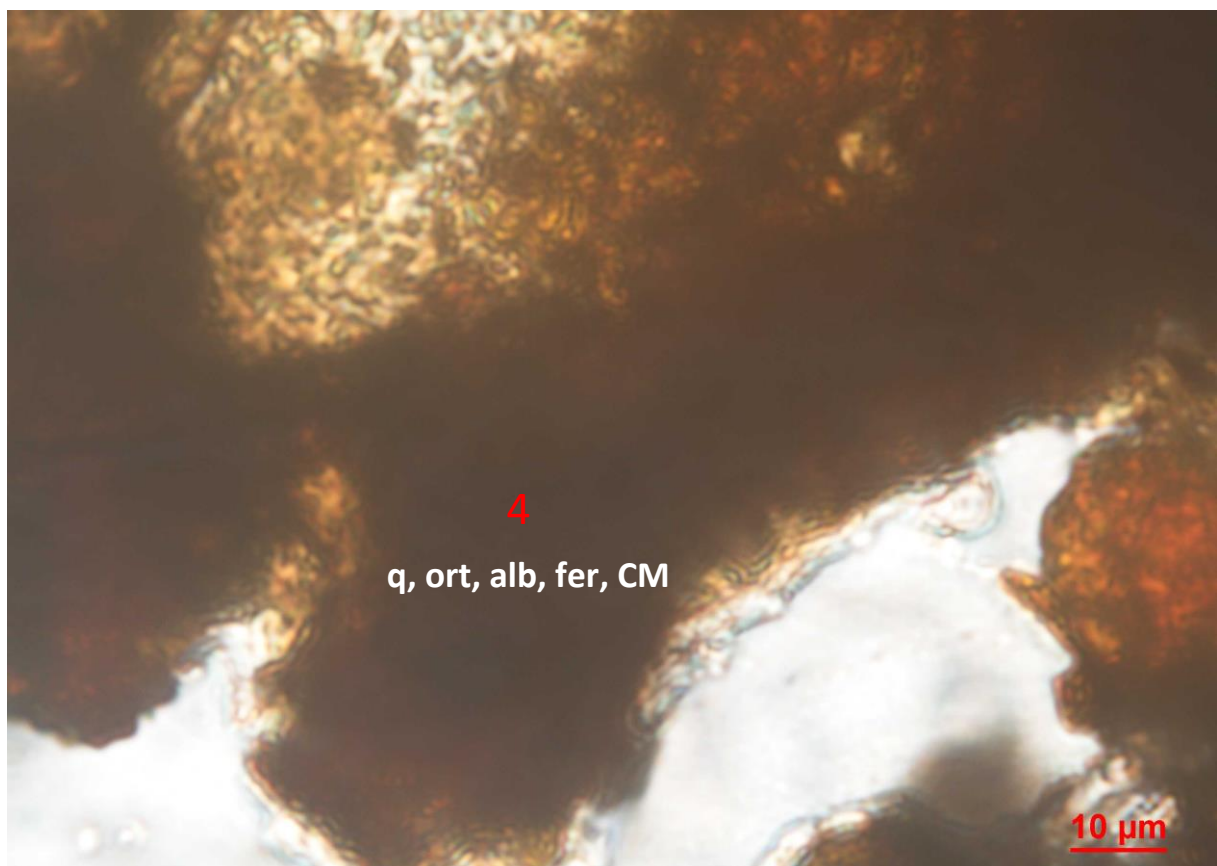



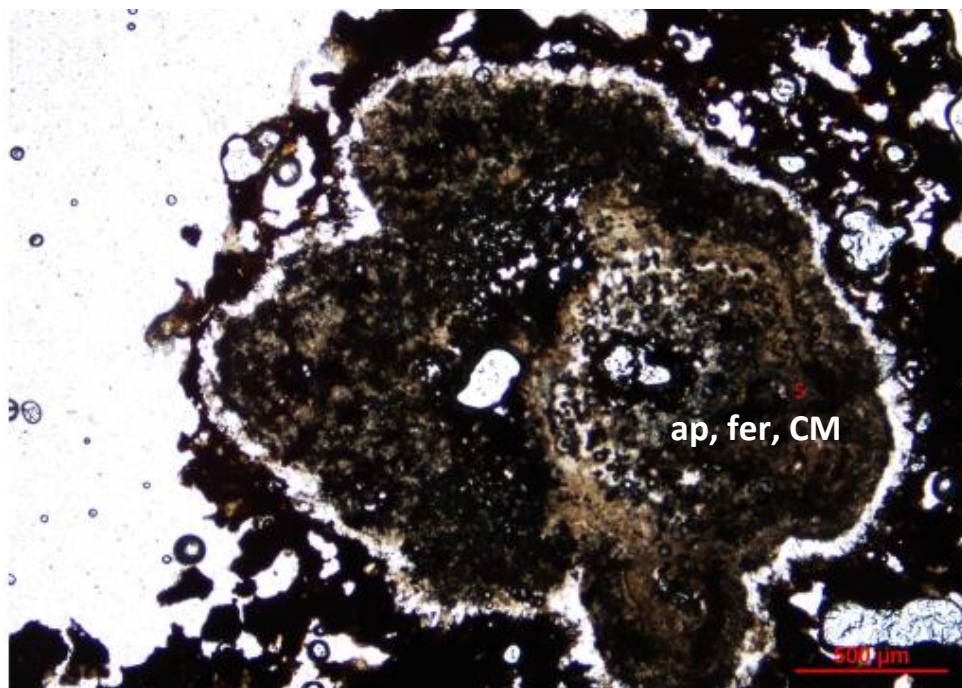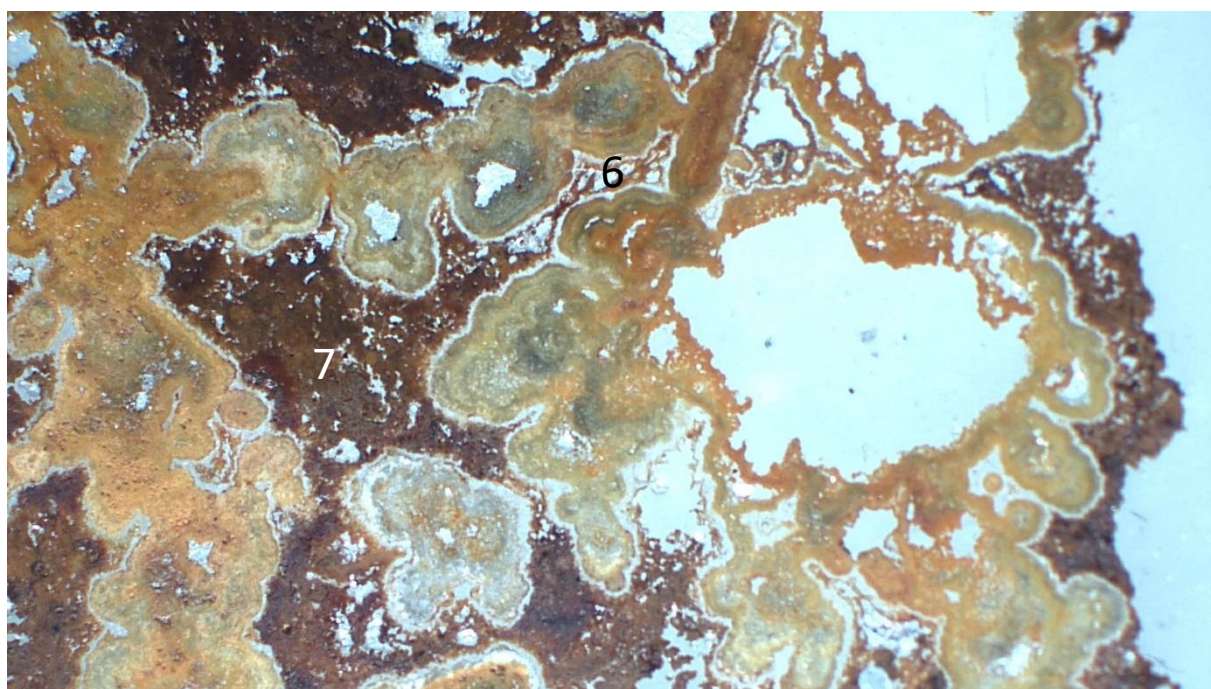



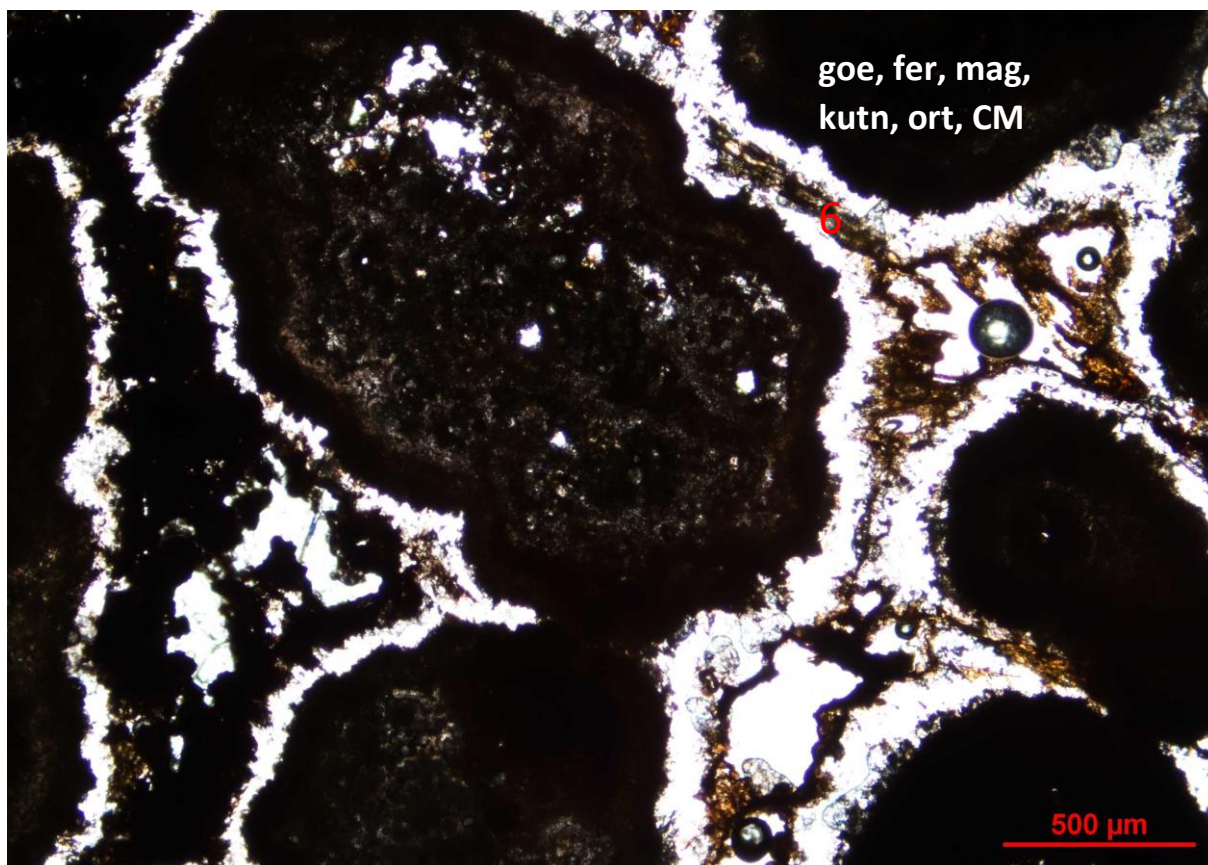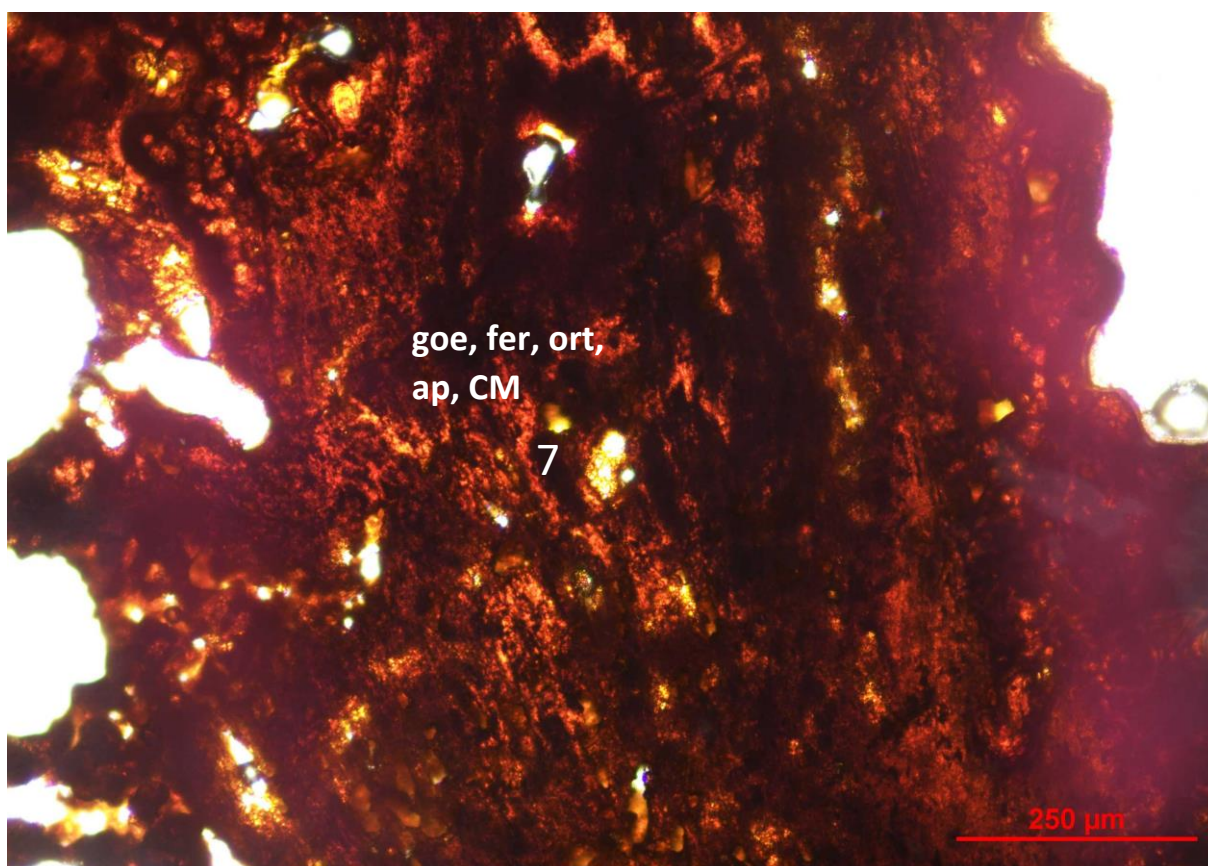

Supplement: s1 [file s1]
